# Supplementary material for: Pd-Catalyzed regio- and stereoselective allylic substitution of vinylethylene carbonates with 1,2,4-triazoles
Source: Royal Society of Chemistry journal article supplement (doi:10.1039/d2ob01156e), 2022-01-01

## Supporting information

# Pd-Catalyzed regio- and stereoselective allylic substitution of vinylethylene carbonates with 1,2,4-triazoles

Sardaraz khan, Babar Hussain Shah, Can Zhao and Yong Jian Zhang\*

Shanghai Key Laboratory for Molecular Engineering of Chiral Drugs, Frontiers Science Center for Transformative Molecules, and School of Chemistry and Chemical Engineering Shanghai Jiao Tong University, 800 Dongchuan Road, Shanghai 200240, P. R. China.

E-mail: yjian@sjtu.edu.cn

### Table of Contents

|                                                                                                                                   |         |
|-----------------------------------------------------------------------------------------------------------------------------------|---------|
| General experimental details .....                                                                                                | S2      |
| General procedure for the synthesis of substituted 1,2,4-triazoles ( <b>2p-2r</b> ) .....                                         | S3      |
| General procedure for Pd-catalyzed allylic substitution of vinylethylene carbonates <b>1a</b> with 1,2,4-Triazole <b>2a</b> ..... | S3      |
| Characterization of compounds ( <b>3a-3r</b> ) .....                                                                              | S3-S9   |
| Procedure for gram scale reaction of <b>3a</b> .....                                                                              | S9      |
| Procedure for Dess-martin oxidation of <b>3a</b> .....                                                                            | S9      |
| Procedure for carbamate synthesis from <b>3a</b> .....                                                                            | S10     |
| Procedure for ester synthesis from <b>3a</b> .....                                                                                | S10-11  |
| Procedure for Hydrogenation of <b>3a</b> .....                                                                                    | S11     |
| X-rays crystallography of <b>3i</b> (CCDC 1975292).....                                                                           | S11-12  |
| References .....                                                                                                                  | S13     |
| NMR charts .....                                                                                                                  | S14-S38 |

## General experimental details

Analytical thin-layer chromatography (TLC) was carried out using 0.2-mm commercial silica gel plates (Yantai Jiangyou Silica Gel Development Co., Ltd., silica gel HSGF 254). Preparative column chromatography employing silica gel (Qingdao Shenghai Fine Silica Gel Chemical Co., Ltd., 200-300 mesh) was performed according to the method of Still. High-resolution mass spectra (HRMS) were performed at Instrumental Analysis Center of Shanghai Jiao Tong University using ESI method. Proton nuclear magnetic resonance ( $^1\text{H}$  NMR) spectra were recorded with a Bruker AVANCE III HD 500 (500 MHz) spectrometer. Chemical shifts are reported in delta ( $\delta$ ) units, parts per million (ppm) downfield from trimethylsilane or deuterated water and ppm relative to the center of the singlet at 7.26 ppm for deuteriochloroform, or ppm relative to the center of the quintet at 3.34 ppm for deuteriomethanol. Coupling constants are reported in Hertz (Hz). Carbon-13 nuclear magnetic resonance ( $^{13}\text{C}$  NMR) spectra were recorded with a Bruker AVANCE III HD 500 (125 MHz) spectrometer. Chemical shifts are reported in delta ( $\delta$ ) units, ppm relative to the center of the triplet at 77.0 ppm for deuteriochloroform and ppm relative to the center of the septet at 49.54 ppm for deuteriomethanol.  $^{13}\text{C}$  NMR spectra were routinely run with broadband decoupling. All of the palladium sources and phosphine ligands were purchased from Sinocompound Co. and used as received.

## General procedure for the synthesis of substituted 1,2,4-triazoles (2p-2r)

1,2,4-Triazoles **2p-2r** were synthesized according to reported procedure, all characterization data are in accordance with literature.<sup>1</sup>

## General procedure for Pd-catalyzed allylic amination of vinyloxy carbonates **1a** with 1,2,4-triazoles **2a**

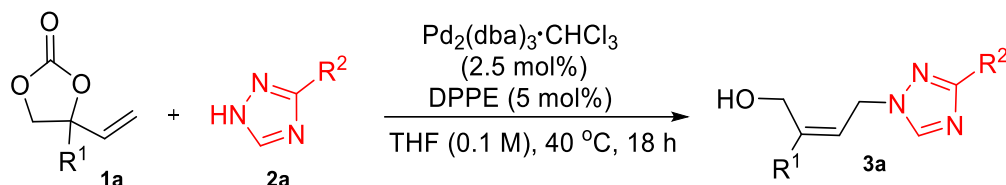

To an oven dried screw-cap reaction tube equipped with a magnetic stir bar,  $\text{Pd}_2(\text{dba})_3 \cdot \text{CHCl}_3$  (5.2 mg, 0.005 mmol, 2.5 mol%), DPPE (3.98 mg, 0.02 mmol, 5 mol%), Ph-VEC **1a** (38.0 mg, 0.2 mmol) and 1,2,4-Triazole **2a** (20.7 mg, 0.3 mmol) were added. The reaction tube was sealed with rubber-septum, then evacuated and backfilled with nitrogen (this process was repeated a total of three times). Anhydrous THF (2 mL) was added via syringe. The resulting mixture was stirred at 40 °C for 18 h. The reaction mixture was cooled to room temperature and the solvent was removed by rotary evaporation under vacuum. The crude product was purified by flash column chromatography on silica gel to afford the corresponding product **3a**.

### (Z)-2-phenyl-4-(1H-1,2,4-triazol-1-yl)but-2-en-1-ol

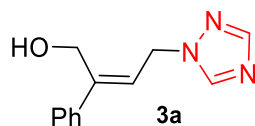

Yield: 96% (41.3 mg); light yellow solid; (*Z:E* = >20:1); Purification: petroleum ether/EtOAc = 1:1; <sup>1</sup>H NMR (500 MHz, CDCl<sub>3</sub>) δ 8.13 (s, 1H), 7.92 (s, 1H), 7.48–7.46 (m, 2H), 7.36–7.28 (m, 3H), 5.99 (t, *J* = 7.8 Hz, 1H), 5.04 (d, *J* = 7.8 Hz, 2H), 4.67 (s, 2H), 4.31 (bs, 1H); <sup>13</sup>C NMR (125 MHz, CDCl<sub>3</sub>) δ 151.9, 146.1, 142.9, 140.0, 128.5, 128.1, 126.3, 122.2, 59.8, 46.8; HRMS (ESI-MS): Calcd. for C<sub>12</sub>H<sub>13</sub>N<sub>3</sub>O (M+Na): 238.0956, Found: 238.0961.

### (Z)-2-(p-tolyl)-4-(1H-1,2,4-triazol-1-yl)but-2-en-1-ol

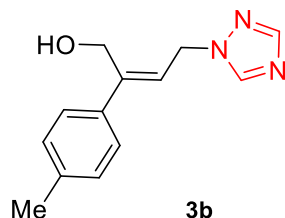

Yield: 93% (42.6 mg); light yellow oil; (*Z:E* = >20:1); Purification: petroleum ether/EtOAc = 2:1; <sup>1</sup>H NMR (500 MHz, CDCl<sub>3</sub>) δ 8.12 (s, 1H), 7.92 (s, 1H), 7.36 (d, *J* = 10.2 Hz, 2H), 7.14 (d, *J* = 9.8 Hz, 2H), 5.97 (t, *J* = 9.6 Hz, 1H), 5.02 (d, *J* = 9.8 Hz, 2H), 4.65 (s, 2H), 3.92 (bs, 1H), 2.33 (s, 3H); <sup>13</sup>C NMR (125 MHz, CDCl<sub>3</sub>) δ 152.0, 146.0, 143.0, 138.0, 137.0, 129.2, 126.2, 121.4, 59.8, 46.8, 21.0; HRMS (ESI-MS): Calcd. for C<sub>13</sub>H<sub>15</sub>N<sub>3</sub>O (M+Na): 252.1113, Found: 252.1108.

### (Z)-2-(2-methoxyphenyl)-4-(1H-1,2,4-triazol-1-yl)but-2-en-1-ol

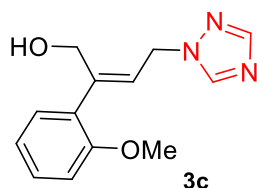

Yield: 83% (40.7 mg); light yellow oil; (*Z:E* = >20:1); Purification: petroleum ether/EtOAc = 1:1; <sup>1</sup>H NMR (500 MHz, CDCl<sub>3</sub>) δ 8.19 (s, 1H), 7.95 (s, 1H), 7.31–7.27 (m, 1H), 7.14 (dd, *J* = 9.2, 2.2 Hz, 1H), 6.96–6.89 (m, 2H), 5.85 (t, *J* = 9.2 Hz, 1H), 5.09 (d, *J* = 9.2 Hz, 2H), 4.49 (s, 2H), 3.86 (s, 3H), 3.00 (bs, 1H); <sup>13</sup>C NMR (125 MHz, CDCl<sub>3</sub>) δ 156.2, 151.9, 145.2, 143.0, 130.3, 130.0, 129.3, 125.4, 121.0, 110.6, 60.9, 55.5, 47.0; HRMS (ESI-MS): Calcd. for C<sub>13</sub>H<sub>15</sub>N<sub>3</sub>O<sub>2</sub> (M+Na): 268.1062, Found: 268.1055.

**(Z)-2-(3-methoxyphenyl)-4-(1H-1,2,4-triazol-1-yl)but-2-en-1-ol**

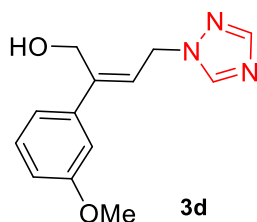

Yield: 90% (44.1 mg); yellow oil; (*Z:E* = >20:1); Purification: petroleum ether/EtOAc = 3:1; <sup>1</sup>H NMR (500 MHz, CDCl<sub>3</sub>) δ 8.13 (s, 1H), 7.93 (s, 1H), 7.28–7.23 (m, 1H), 7.05–7.00 (m, 2H), 6.84 (dd, *J* = 10.4, 3.1 Hz, 1H), 5.99 (t, *J* = 9.6 Hz, 1H), 5.04 (d, *J* = 9.6 Hz, 2H), 4.64 (s, 2H), 3.79 (s, 3H), 4.47 (bs, 1H); <sup>13</sup>C NMR (125 MHz, CDCl<sub>3</sub>) δ 159.6, 152.0, 145.9, 143.0, 141.5, 129.5, 122.5, 118.8, 113.4, 112.2, 59.9, 55.2, 46.8; HRMS (ESI-MS): Calcd. for C<sub>13</sub>H<sub>15</sub>N<sub>3</sub>O<sub>2</sub> (M+Na): 268.1062, Found: 268.1059.

**(Z)-2-(4-methoxyphenyl)-4-(1H-1,2,4-triazol-1-yl)but-2-en-1-ol**

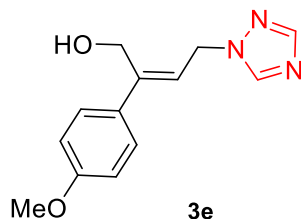

Yield: 93% (45.6 mg); light yellow solid; (*Z:E* = >20:1); Purification: petroleum ether/EtOAc = 1:1; <sup>1</sup>H NMR (500 MHz, CDCl<sub>3</sub>) δ 8.12 (s, 1H), 7.92 (s, 1H), 7.41 (d, *J* = 8.8 Hz, 2H), 7.86 (d, *J* = 8.8 Hz, 2H), 5.93 (t, *J* = 7.8 Hz, 1H), 5.01 (d, *J* = 7.8 Hz, 2H), 4.64 (s, 2H), 4.32 (bs, 1H), 3.79 (s, 3H); <sup>13</sup>C NMR (125 MHz, CDCl<sub>3</sub>) δ 159.5, 151.9, 145.4, 142.8, 132.2, 127.5, 120.5, 113.8, 59.7, 55.2, 46.8; HRMS (ESI-MS): Calcd. for C<sub>13</sub>H<sub>15</sub>N<sub>3</sub>O<sub>2</sub> (M+H): 246.1243, Found: 246.1272.

**(Z)-2-(4-fluorophenyl)-4-(1H-1,2,4-triazol-1-yl)but-2-en-1-ol**

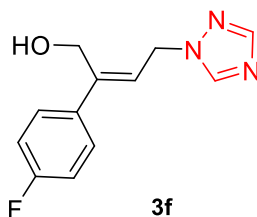

Yield: 95% (44.6 mg); light yellow oil; (*Z:E* = 20:1); Purification: petroleum ether/EtOAc = 2:1; <sup>1</sup>H NMR (500 MHz, CDCl<sub>3</sub>) δ 8.15 (s, 1H), 7.95 (s, 1H), 7.48–7.44 (m, 2H), 7.02 (dd, *J* = 8.7, 8.6 Hz, 2H), 5.93 (t, *J* = 7.9 Hz, 1H), 5.03 (d, *J* = 7.9 Hz, 2H), 4.65 (s, 2H), 4.08 (bs, 1H); <sup>13</sup>C NMR (125 MHz, CDCl<sub>3</sub>)

$\delta$  163.7, 161.7, 152.2, 145.6, 143.0, 136.3, 136.2, 128.2, 128.1, 122.1, 115.5, 115.4, 59.9, 46.7;  $^{19}\text{F}$  NMR (376 MHz,  $\text{CDCl}_3$ )  $\delta$  -113.72; HRMS (ESI-MS): Calcd. for  $\text{C}_{12}\text{H}_{12}\text{FN}_3\text{O}$  (M+H): 234.1043, Found: 234.1046.

**(Z)-2-(4-chlorophenyl)-4-(1H-1,2,4-triazol-1-yl)but-2-en-1-ol**

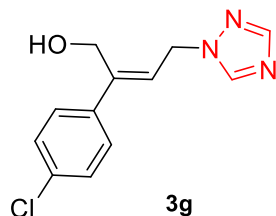

Yield: 95% (44.8 mg); light yellow oil; (*Z:E* = 17:1); Purification: petroleum ether/EtOAc = 1:1;  $^1\text{H}$  NMR (500 MHz,  $\text{CDCl}_3$ )  $\delta$  8.14 (s, 1H), 7.95 (s, 1H), 7.41 (d,  $J$  = 10.6 Hz, 2H), 7.30 (d,  $J$  = 10.8 Hz, 2H), 5.99 (t,  $J$  = 9.8 Hz, 1H), 5.04 (d,  $J$  = 9.8 Hz, 2H), 4.64 (s, 2H), 3.36 (bs, 1H);  $^{13}\text{C}$  NMR (125 MHz,  $\text{CDCl}_3$ )  $\delta$  152.1, 145.3, 143.02, 138.5, 134.0, 128.6, 127.7, 122.6, 59.7, 46.6; HRMS (ESI-MS): Calcd. for  $\text{C}_{12}\text{H}_{12}\text{ClN}_3\text{O}$  (M+H): 250.0747, Found: 250.0733.

**(Z)-2-(3-bromophenyl)-4-(1H-1,2,4-triazol-1-yl)but-2-en-1-ol**

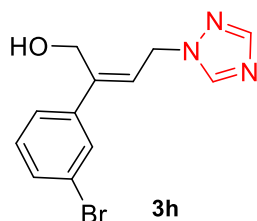

Yield: 97% (56.8 mg); light yellow oil; (*Z:E* = 13:1); Purification: petroleum ether/EtOAc = 1:1;  $^1\text{H}$  NMR (500 MHz,  $\text{CDCl}_3$ )  $\delta$  8.15 (s, 1H), 7.96 (s, 1H), 7.62 (dd,  $J$  = 4.6, 2.4 Hz, 1H), 7.44–7.39 (m, 2H), 7.20 (d,  $J$  = 9.9, 9.8 Hz, 1H), 6.00 (t,  $J$  = 9.8 Hz, 1H), 5.05 (d,  $J$  = 9.8 Hz, 2H), 4.64 (s, 2H), 3.57 (bs, 1H);  $^{13}\text{C}$  NMR (125 MHz,  $\text{CDCl}_3$ )  $\delta$  152.1, 145.2, 143.0, 142.3, 131.0, 130.0, 129.4, 125.0, 123.3, 122.6, 59.7, 46.6; HRMS (ESI-MS): Calcd. for  $\text{C}_{12}\text{H}_{12}\text{BrN}_3\text{O}$  (M+H): 294.0242, Found: 294.0237.

**(Z)-2-(4-bromophenyl)-4-(1H-1,2,4-triazol-1-yl)but-2-en-1-ol**

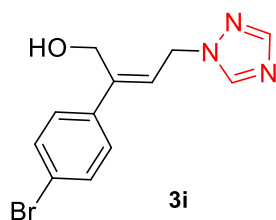

Yield: 94% (55.1 mg); light yellow solid; 108-110 °C; (*Z:E* = >20:1); Purification: petroleum ether/EtOAc = 1:1;  $^1\text{H}$  NMR (500 MHz,  $\text{CDCl}_3$ )  $\delta$  8.14 (s, 1H), 7.95 (s, 1H), 7.46 (d,  $J$  = 8.6 Hz, 2H), 7.35 (d,  $J$  = 8.6 Hz, 2H), 6.00 (t,  $J$  = 7.9 Hz, 1H), 5.03 (d,  $J$  = 7.8 Hz, 2H), 4.64 (s, 2H), 4.24 (bs, 1H);  $^{13}\text{C}$  NMR (125 MHz,  $\text{CDCl}_3$ )  $\delta$  152.1, 145.4, 143.0, 139.0, 131.6, 1278.0, 122.6, 122.2, 59.6, 46.6; HRMS (ESI-MS): Calcd. for  $\text{C}_{12}\text{H}_{12}\text{BrN}_3\text{O}$  (M+H): 294.0242, Found: 294.0256.

**(Z)-2-(3,4-dichlorophenyl)-4-(1H-1,2,4-triazol-1-yl)but-2-en-1-ol**

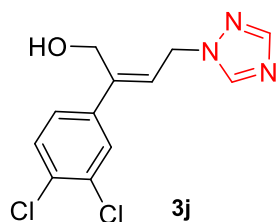

Yield: 90% (50.9 mg); yellow oil; (*Z:E* = 10:1); Purification: petroleum ether/EtOAc = 1:1; <sup>1</sup>H NMR (500 MHz, CDCl<sub>3</sub>) δ 8.16 (s, 1H), 7.96 (s, 1H), 7.58 (d, *J* = 2.6 Hz, 1H), 7.41–7.37 (m, 1H), 7.33–7.30 (m, 1H), 6.02 (t, *J* = 9.8 Hz, 1H), 5.05 (d, *J* = 9.8 Hz, 2H), 4.62 (s, 2H), 3.54 (bs, 1H); <sup>13</sup>C NMR (125 MHz, CDCl<sub>3</sub>) δ 152.2, 144.4, 143.0, 140.1, 132.6, 132.1, 130.4, 128.3, 125.7, 123.5, 59.5, 46.5; HRMS (ESI-MS): Calcd. for C<sub>12</sub>H<sub>11</sub>Cl<sub>2</sub>N<sub>3</sub>O (M+H): 284.0357, Found: 284.0352.

**(Z)-2-(benzo[d][1,3]dioxol-4-yl)-4-(1H-1,2,4-triazol-1-yl)but-2-en-1-ol**

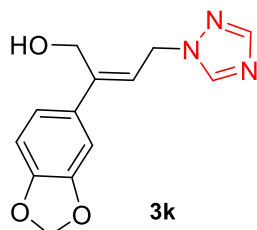

Yield: 89% (46.1 mg); yellow oil; (*Z:E* = 20:1); Purification: petroleum ether/EtOAc = 2:1; <sup>1</sup>H NMR (500 MHz, CDCl<sub>3</sub>) δ 8.14 (s, 1H), 7.94 (s, 1H), 6.98–6.95 (m, 2H), 6.77 (d, *J* = 10.7 Hz, 1H), 5.94 (s, 2H), 5.91 (t, *J* = 9.8 Hz, 1H), 5.01 (d, *J* = 9.8 Hz, 2H), 4.61 (s, 2H), 4.28 (bs, 1H); <sup>13</sup>C NMR (125 MHz, CDCl<sub>3</sub>) δ 151.9, 147.8, 147.5, 145.8, 142.9, 134.2, 121.1, 120.1, 108.2, 106.8, 101.1, 59.8, 46.8; HRMS (ESI-MS): Calcd. for C<sub>13</sub>H<sub>13</sub>N<sub>3</sub>O<sub>3</sub> (M+Na): 282.0855, Found: 282.0854.

**(Z)-2-(naphthalen-1-yl)-4-(1H-1,2,4-triazol-1-yl)but-2-en-1-ol**

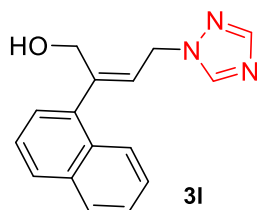

Yield: 79% (41.9 mg); light yellow oil; (*Z:E* = 20:1); Purification: petroleum ether/EtOAc = 2:1; <sup>1</sup>H NMR (500 MHz, CDCl<sub>3</sub>) δ 8.15 (s, 1H), 7.97 (s, 1H), 7.89–7.83 (m, 2H), 7.78 (d, *J* = 8.2 Hz, 1H), 7.49–7.44 (m, 2H), 7.42–7.39 (m, 1H), 7.30 (dd, *J* = 7.0, 1.4 Hz, 1H), 5.85 (t, *J* = 7.8 Hz, 1H), 5.15 (d, *J* = 7.8 Hz, 2H), 4.65 (s, 2H), 3.98 (bs, 1H); <sup>13</sup>C NMR (125 MHz, CDCl<sub>3</sub>) δ 152.0, 146.5, 142.9, 138.8, 133.6, 131.0, 128.4, 128.1, 126.3, 125.9, 125.9, 125.2, 125.1, 125.0, 62.2, 46.6; HRMS (ESI-MS): Calcd. for C<sub>16</sub>H<sub>15</sub>N<sub>3</sub>O (M+H): 266.1293, Found: 266.1287.

**(Z)-2-(naphthalen-2-yl)-4-(1H-1,2,4-triazol-1-yl)but-2-en-1-ol**

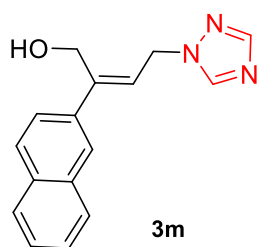

Yield: 94% (49.8 mg); light brown solid; (*Z*:*E* = 20:1); Purification: petroleum ether/EtOAc = 1:1; <sup>1</sup>H NMR (500 MHz, CDCl<sub>3</sub>) δ 8.10 (s, 1H), 7.94 (s, 1H), 7.93 (s, 1H), 7.81–7.76 (m, 3H), 7.55 (dd, *J* = 10.7, 2.3 Hz, 1H), 7.48–7.43 (m, 2H), 6.09 (t, *J* = 9.7 Hz, 1H), 5.02 (d, *J* = 9.8 Hz, 2H), 4.74 (s, 2H), 4.30 (bs, 1H); <sup>13</sup>C NMR (125 MHz, CDCl<sub>3</sub>) δ 151.9, 146.0, 142.9, 137.2, 133.2, 132.9, 128.1, 128.1, 127.5, 126.3, 126.2, 125.5, 124.2, 122.6, 59.8, 46.8; HRMS (ESI-MS): Calcd. for C<sub>16</sub>H<sub>15</sub>N<sub>3</sub>O (M+Na): 288.1113, Found: 288.1108.

**(*Z*)-4-(1*H*-1,2,4-triazol-1-yl)but-2-en-1-ol**

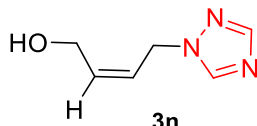

Yield: 53% (14.7 mg); light yellow oil; (*Z*:*E* = 5:1, *l*:*b* = 1.3:1); Purification: petroleum ether/EtOAc = 1:1; <sup>1</sup>H NMR (500 MHz, CDCl<sub>3</sub>) for *Z* isomer: δ 8.13 (s, 1H), 7.94 (s, 1H), 6.03–5.97 (m, 1H), 5.77–5.70 (m, 1H), 4.92 (d, *J* = 9.1 Hz, 2H), 4.33 (d, *J* = 7.0 Hz, 2H), 3.18 (bs, 1H); <sup>1</sup>H NMR (500 MHz, CDCl<sub>3</sub>) for *E* isomer: δ 8.11(s, 1H), 7.94 (s, 1H), 5.93–5.91 (m, 2H), 4.80 (d, *J* = 5.3 Hz, 2H), 4.19 (d, *J* = 1.7 Hz, 2H), 2.56 (bs, 1H); <sup>13</sup>C NMR (125 MHz, CDCl<sub>3</sub>) for *Z* isomer: δ 151.7, 142.6, 135.0, 123.8, 58.0, 46.2; <sup>13</sup>C NMR (125 MHz, CDCl<sub>3</sub>) for *E* isomer: δ 151.6, 142.7, 135.4, 123.0, 61.8, 51.0; HRMS (ESI-MS): Calcd. for C<sub>6</sub>H<sub>9</sub>N<sub>3</sub>O (M+H): 140.0824, Found: 140.0809.

**2-(1*H*-1,2,4-triazol-1-yl)but-3-en-1-ol**

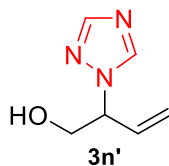

Yield: 40% (11.2 mg); light yellow oil; Purification: petroleum ether/EtOAc = 5:1; <sup>1</sup>H NMR (500 MHz, CDCl<sub>3</sub>): δ 8.13 (s, 1H), 7.92 (s, 1H), 6.07 (ddd, *J* = 17.4, 10.5, 7.1 Hz, 1H), 5.42 (d, *J* = 10.5 Hz, 1H), 5.30 (d, *J* = 17.2 Hz, 1H), 4.91 (tdd, *J* = 6.9, 3.0, 1.2 Hz, 1H), 4.14–3.94 (m, 2H), 3.83 (s, 1H); <sup>13</sup>C NMR (125 MHz, CDCl<sub>3</sub>): δ 151.6, 143.1, 132.0, 120.4, 64.5, 64.0; HRMS (ESI-MS): Calcd. for C<sub>6</sub>H<sub>9</sub>N<sub>3</sub>O (M+H): 140.0824, Found: 140.0818.

**(*Z*)-2-methyl-4-(1*H*-1,2,4-triazol-1-yl)but-2-en-1-ol**

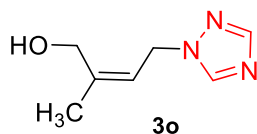

Yield: 32% (9.8 mg); light yellow oil; (*Z*:*E* = 17:1, *l*:*b* = 1:3); Purification: petroleum ether/EtOAc = 2:1; <sup>1</sup>H NMR (500 MHz, CDCl<sub>3</sub>) δ 8.09 (s, 1H), 7.94 (s, 1H), 5.54 (t, *J* = 7.8 Hz, 1H), 4.87 (d, *J* = 7.8 Hz, 2H), 4.26 (s, 2H), 3.70 (bs, 1H), 1.88 (s, 3H); <sup>13</sup>C NMR (125 MHz, CDCl<sub>3</sub>) δ 151.9, 143.8, 142.7, 119.2, 61.4, 46.3, 22.0; HRMS (ESI-MS): Calcd. for C<sub>7</sub>H<sub>11</sub>N<sub>3</sub>O (M+H): 154.0980, Found: 154.0975.

**2-methyl-2-(1*H*-1,2,4-triazol-1-yl)but-3-en-1-ol**

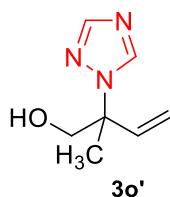

Yield: 51% (15.7 mg); light yellow oil; Purification: petroleum ether/EtOAc = 5:1;  $^1\text{H}$  NMR (500 MHz,  $\text{CDCl}_3$ )  $\delta$  8.15 (s, 1H), 8.01–7.64 (m, 1H), 6.14 (dd,  $J = 17.5, 10.8$  Hz, 1H), 5.39 (d,  $J = 10.8$  Hz, 1H), 5.20 (d,  $J = 17.5$  Hz, 1H), 4.13 (bs, 1H), 3.99 (d,  $J = 11.8$  Hz, 1H), 3.85 (d,  $J = 11.3$  Hz, 1H), 1.69 (s, 3H);  $^{13}\text{C}$  NMR (125 MHz,  $\text{CDCl}_3$ )  $\delta$  151.1, 142.2, 137.6, 117.4, 68.4, 65.6, 21.7; HRMS (ESI-MS): Calcd. for  $\text{C}_7\text{H}_{11}\text{N}_3\text{O}$  (M+H): 154.0980, Found: 154.0975.

**(Z)-2-phenyl-4-(3-phenyl-1H-1,2,4-triazol-1-yl)but-2-en-1-ol**

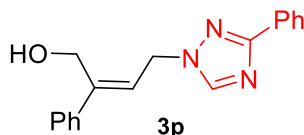

Yield: 96% (55.9 mg); light yellow oil; ( $Z:E = >20:1$ ); Purification: petroleum ether/EtOAc = 1:1;  $^1\text{H}$  NMR (500 MHz,  $\text{CDCl}_3$ )  $\delta$  8.13 (s, 1H), 8.05–7.03 (m, 2H), 7.51–7.49 (m, 2H), 7.44–7.37 (m, 3H), 7.36–7.28 (m, 3H), 6.05 (t,  $J = 8.0$  Hz, 1H), 5.03 (d,  $J = 8.1$  Hz, 2H), 4.72 (s, 2H), 4.47 (bs, 1H);  $^{13}\text{C}$  NMR (125 MHz,  $\text{CDCl}_3$ )  $\delta$  163.0, 146.8, 143.8, 140.2, 130.3, 129.5, 128.7, 128.5, 128.2, 126.3, 126.3, 122.2, 60.0, 46.8; HRMS (ESI-MS): Calcd. for  $\text{C}_{18}\text{H}_{17}\text{N}_3\text{O}$  (M+H): 292.1450, Found: 292.1445.

**(E)-4-(3-(4-methoxyphenyl)-1H-1,2,4-triazol-1-yl)-2-phenylbut-2-en-1-ol**

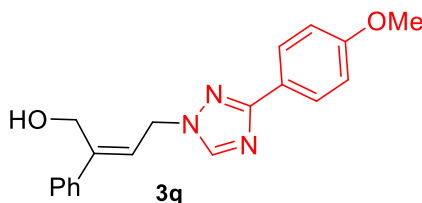

Yield: 96% (61.7 mg); light yellow oil; ( $Z:E = 5:1$ ); Purification: petroleum ether/EtOAc = 2:1;  $^1\text{H}$  NMR (500 MHz,  $\text{CDCl}_3$ ) for  $Z$  isomer:  $\delta$  8.09 (s, 1H), 7.98–7.94 (m, 2H), 7.51–7.49 (m, 2H), 7.36–7.28 (m, 3H), 6.95–7.92 (m, 2H), 6.05 (t,  $J = 8.0$  Hz, 1H), 5.01 (d,  $J = 8.0$  Hz, 2H), 4.70 (d,  $J = 4.6$  Hz, 2H), 4.56 (dd,  $J = 6.0, 6.0$  Hz, 1H), 3.83 (s, 3H);  $^1\text{H}$  NMR (500 MHz,  $\text{CDCl}_3$ ) for  $E$  isomer:  $\delta$  7.94 (s, 1H), 7.60–7.58 (m, 2H), 7.51–7.49 (m, 2H), 7.36–7.28 (m, 3H), 7.04–7.03 (m, 2H), 6.02 (t,  $J = 7.8$  Hz, 1H), 5.05 (d,  $J = 7.9$  Hz, 2H), 4.65 (d,  $J = 5.0$  Hz, 2H), 4.27 (dd,  $J = 6.6, 4.3$  Hz, 1H), 3.87 (s, 3H);  $^{13}\text{C}$  NMR (125 MHz,  $\text{CDCl}_3$ ) for  $Z$  isomer:  $\delta$  162.9, 160.6, 146.8, 143.6, 140.3, 128.5, 128.4, 128.1, 127.7, 126.3, 122.2, 114.0, 59.9, 55.3, 46.7;  $^{13}\text{C}$  NMR (125 MHz,  $\text{CDCl}_3$ ) for  $E$  isomer:  $\delta$  161.2, 154.7, 150.9, 146.3, 140.4, 130.3, 128.0, 126.4, 123.0, 122.8, 119.8, 114.4, 60.0, 55.4, 46.4; HRMS (ESI-MS): Calcd. for  $\text{C}_{19}\text{H}_{19}\text{N}_3\text{O}_2$  (M+H): 322.1256, Found: 322.1245.

**(Z)-4-(3-(4-chlorophenyl)-1H-1,2,4-triazol-1-yl)-2-phenylbut-2-en-1-ol**

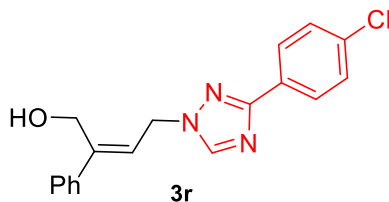

Yield: 96% (59.9 mg); light yellow oil; ( $Z:E = 20:1$ ); Purification: petroleum ether/EtOAc = 1:1;  $^1\text{H}$  NMR (500 MHz,  $\text{CDCl}_3$ )  $\delta$  8.14 (s, 1H), 7.97 (d,  $J = 8.6$  Hz, 2H), 7.51–7.49 (m, 2H), 7.39 (d,  $J = 8.6$  Hz, 2H), 7.37–7.29 (m, 3H), 6.06 (t,  $J = 8.0$  Hz, 1H), 5.05 (d,  $J = 8.0$  Hz, 2H), 4.72 (s, 2H), 4.20 (dd,  $J = 6.3, 6.2$  Hz, 1H);  $^{13}\text{C}$  NMR (125 MHz,  $\text{CDCl}_3$ )  $\delta$   $^{13}\text{C}$  NMR (126 MHz, Chloroform- $d$ )  $\delta$  162.1, 146.9, 143.9,



140.0, 135.4, 128.9, 128.9, 128.6, 128.2, 127.6, 126.3, 122.2, 60.0, 46.9; HRMS (ESI-MS): Calcd. for  $C_{18}H_{16}ClN_3O$  (M+H): 326.1060, Found: 326.1064.

### Procedure for gram scale reaction of **3a**

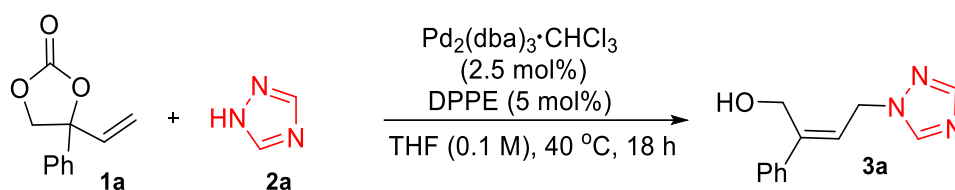

To an oven dried screw-cap reaction tube equipped with a magnetic stir bar,  $Pd_2(dba)_3 \cdot CHCl_3$  (0.156 g, 0.15 mmol, 2.5 mol%), DPPE (0.119 g, 0.30 mmol, 5 mol%), Ph-VEC **1a** (1.140 g, 6.0 mmol) and 1,2,4-triazole **2a** (0.621 g, 9.0 mmol) were added. The reaction flask was sealed with rubber-septum, then evacuated and backfilled with nitrogen (this process was repeated a total of three times). Anhydrous THF (30 mL) was added via syringe. The resulting mixture was stirred at 40 °C for 18 h. The reaction mixture was cooled to room temperature and the solvent was removed by rotary evaporation under vacuum. The crude product was purified by flash column chromatography on silica gel to afford the corresponding product **3a** as light yellow solid in 91% (1.174 g) and  $Z:E = >20:1$ .

### Procedure for Dess-Martin oxidation of **3a**

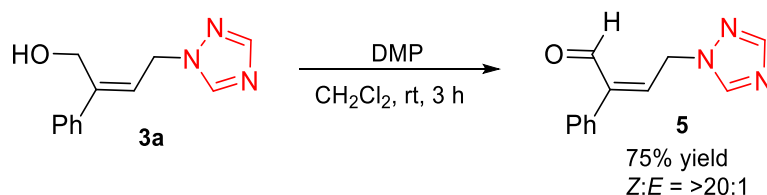

### (*Z*)-2-phenyl-4-(1*H*-1,2,4-triazol-1-yl)but-2-enal

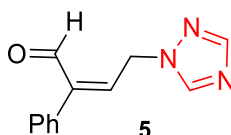

A screw-capped vial was charged with the **3a** (43.0 mg, 0.2 mmol), DMP (93.3 mg, 0.220 mmol, 1.10 equiv.),  $CH_2Cl_2$  (5 mL). The reaction mixture was stirred for 3 hours at room temperature. The mixture reaction washed twice with a saturated solution (5 mL) of  $NaHCO_3/Na_2S_2O_3$  (1:1). And then the liquid was extracted with  $CH_2Cl_2$  three times. After drying over  $Na_2SO_4$  for 30 minutes, the combined organic phase was concentrated by evaporated under reduced pressure, and then the residue was purified by chromatography on silica gel to afford **5** as yellow oil in 75% yield (34.4 mg).<sup>2</sup>( $Z:E = >20:1$ ); Purification: petroleum ether/EtOAc = 3:1;  $^1H$  NMR (500 MHz,  $CDCl_3$ )  $\delta$  9.70 (s, 1H), 8.05 (s, 1H), 7.00 (s, 1H), 7.49–7.42 (m, 3H), 7.24–7.22 (m, 2H), 6.83 (t,  $J = 6.5$  Hz, 1H), 5.08 (d,  $J = 6.4$  Hz, 2H);  $^{13}C$  NMR (125 MHz,  $CDCl_3$ )  $\delta$  192.1, 152.5, 145.6, 144.0, 143.0, 130.8, 129.1, 129.0, 128.7, 47.8; HRMS (ESI-MS): Calcd. for  $C_{12}H_{11}N_3O$  (M+H): 294.0980, Found: 294.0977.

### Procedure for carbamate synthesis from 3a

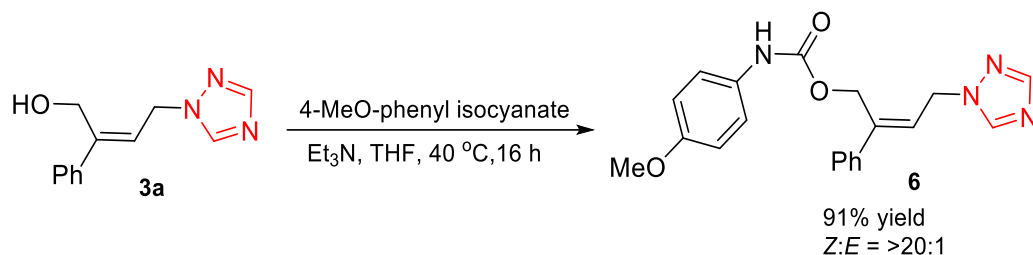

### (Z)-2-phenyl-4-(1H-1,2,4-triazol-1-yl)but-2-en-1-yl(4-methoxyphenyl)carbamate

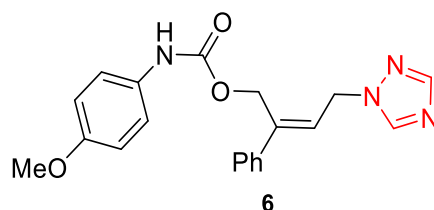

A screw-capped vial was charged with the **3a** (43.0 mg, 0.2 mmol), 4-MeO-phenyl isocyanate (35.8 mg, 0.240 mmol, 1.2 equiv.), Et<sub>3</sub>N (36.2 uL, 0.260 mmol, 1.3 equiv.) and THF (2.0 mL). The reaction mixture was stirred for 16 hours under N<sub>2</sub> at 40 °C. After filtration, the mixture was extracted with EtOAc, dried over anhydrous Na<sub>2</sub>SO<sub>4</sub>, and the solvent was removed in vacuum. The crude product was purified by flash column chromatography on silica gel to get the desired product **6** as light yellow oil in 91% yield (66.3 mg). (Z:E = >20:1); Purification: petroleum ether/EtOAc = 1:1; <sup>1</sup>H NMR (500 MHz, CDCl<sub>3</sub>) δ 9.70 (s, 1H), 8.18 (s, 1H), 7.95 (s, 1H), 7.44–7.42 (m, 2H), 7.36–7.31 (m, 3H), 7.27–7.21 (m, 2H), 7.07 (bs, 1H), 6.85–6.81 (m, 2H), 6.12 (t, *J* = 7.0 Hz, 1H), 5.18 (s, 4H); <sup>13</sup>C NMR (125 MHz, CDCl<sub>3</sub>) δ 156.0, 153.6, 151.9, 143.0, 139.3, 138.8, 130.6, 128.6, 128.3, 126.4, 125.8, 120.7, 114.2, 61.0, 55.4, 47.4; HRMS (ESI-MS): Calcd. for C<sub>20</sub>H<sub>20</sub>N<sub>4</sub>O<sub>3</sub> (M+H): 365.1614, Found: 365.1604.

### Procedure for ester synthesis from 3a

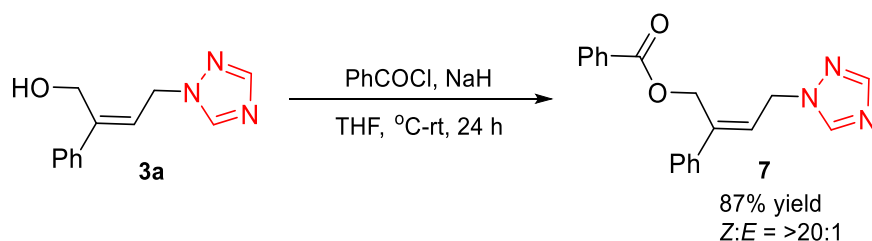

### (Z)-2-phenyl-4-(1H-1,2,4-triazol-1-yl)but-2-en-1-yl benzoate

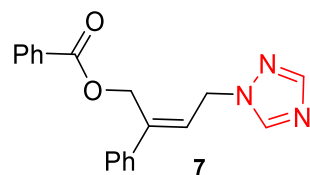

A screw-capped vial was charged with the **3a** (43.0 mg, 0.2 mmol), benzoyl chloride (30.2 uL, 0.260 mmol, 1.3 equiv.), NaH (10.4 mg, 0.433 mmol, 1.3 equiv.) and THF (2.0 mL). The reaction mixture was initially stirred at 0 °C for 30 minutes and then stirred under N<sub>2</sub> atmosphere at room temperature for 24

hours. After filtration, the mixture was extracted with EtOAc, dried over anhydrous Na<sub>2</sub>SO<sub>4</sub>, and the solvent was removed in vacuum. The crude product was purified by flash column chromatography on silica gel to get the target product **7** as colorless oil in 87% yield (55.5 mg). (*Z:E* = >20:1); Purification: petroleum ether/EtOAc = 7:3; <sup>1</sup>H NMR (500 MHz, CDCl<sub>3</sub>) δ 8.20 (s, 1H), 7.97 (s, 1H), 7.96–7.94 (m, 2H), 7.57–7.54 (m, 1H), 7.50–7.48 (m, 2H), 7.43–7.40 (m, 2H), 7.39–7.32 (m, 3H), 6.20 (t, *J* = 7.0 Hz, 1H), 5.38 (s, 2H), 7.05 (d, *J* = 6.4 Hz, 2H); <sup>13</sup>C NMR (125 MHz, CDCl<sub>3</sub>) δ 166.3, 152.2, 143.0, 139.0, 139.0, 133.3, 129.6, 129.6, 128.6, 128.5, 128.4, 126.4, 126.2, 61.3, 47.6; HRMS (ESI-MS): Calcd. for C<sub>19</sub>H<sub>17</sub>N<sub>3</sub>O<sub>2</sub> (M+H): 320.1399, Found: 320.1405.

### Procedure for Hydrogenation of **3a**

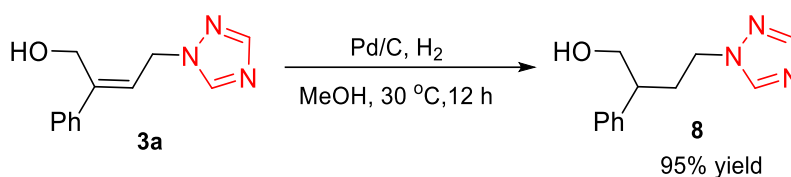

### 2-phenyl-4-(1*H*-1,2,4-triazol-1-yl)butan-1-ol

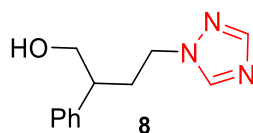

A screw-capped vial was charged with the **3a** (43.0 mg, 0.2 mmol), the Pd/C (10%) catalyst (2.1 mg, 10 mol%) and MeOH (2.0 mL). The reaction mixture was stirred for 12 hours under H<sub>2</sub> at room temperature. After filtration, the mixture was extracted with EtOAc, dried over anhydrous Na<sub>2</sub>SO<sub>4</sub>, and the solvent was removed in vacuum. The crude product was purified by flash column chromatography on silica gel to afford **8** as colorless oil in 95% yield (41.2 mg).<sup>3</sup> Purification: petroleum ether/EtOAc = 1:2; <sup>1</sup>H NMR (500 MHz, CDCl<sub>3</sub>) δ 7.87 (s, 1H), 7.83 (s, 1H), 7.36–7.33 (m, 2H), 7.29–7.25 (m, 1H), 7.19–7.17 (m, 2H), 4.11–3.98 (m, 2H), 3.77–3.69 (m, 2H), 2.72–2.66 (m, 1H), 2.55 (bs, 1H), 2.49–2.42 (m, 1H), 2.19–2.11 (m, 1H); <sup>13</sup>C NMR (125 MHz, CDCl<sub>3</sub>) δ 151.8, 142.9, 140.4, 128.9, 127.9, 127.2, 67.0, 47.5, 45.6, 31.7; HRMS (ESI-MS): Calcd. for C<sub>12</sub>H<sub>15</sub>N<sub>3</sub>O (M+H): 218.1293, Found: 218.1302.

### X-rays crystallography of **3i** (CCDC 1975292)

A single crystal of **3i** was obtained from THF/*n*-Hexane solvent at room temperature. Diffraction data were collected on Bruker SMART Apex-III CMOS-Based X-ray diffractometer with Cu-K $\alpha$ . Radiation ( $\lambda$  = 1.54178). The empirical absorption correction was applied by using the SADABS program. The structure was solved using direct method, and refined by full matrix least-squares on F2 (G.M Sheldrick, SHELXTL2014, program of crystal structure refinement, University of Göttingen, Germany).

**Table 1. Crystal data and structure refinement for **3i****

|                             |                                                    |
|-----------------------------|----------------------------------------------------|
| Identification code         | <b>3i</b>                                          |
| Empirical formula           | C <sub>12</sub> H <sub>12</sub> BrN <sub>3</sub> O |
| Formula weight              | 294.16                                             |
| Temperature                 | 296(2) K                                           |
| Wavelength                  | 1.54178 Å                                          |
| Crystal system, space group | Monoclinic, P2(1)/n                                |

|                                   |                                             |                      |
|-----------------------------------|---------------------------------------------|----------------------|
| Unit cell dimensions              | a = 4.7996(13) Å                            | alpha = 90 deg.      |
|                                   | b = 9.8909(15) Å                            | beta = 92.99(2) deg. |
|                                   | c = 26.029(4) Å                             | gamma = 90 deg.      |
| Volume                            | 1234.0(4) Å <sup>3</sup>                    |                      |
| Z, Calculated density             | 4, 1.583 Mg/m <sup>3</sup>                  |                      |
| Absorption coefficient            | 4.444 mm <sup>-1</sup>                      |                      |
| F(000)                            | 592                                         |                      |
| Crystal size                      | 0.180 x 0.160 x 0.150 mm                    |                      |
| Theta range for data collection   | 3.400 to 68.419 deg.                        |                      |
| Limiting indices                  | -5<=h<=5, -11<=k<=11, -30<=l<=31            |                      |
| Reflections collected / unique    | 14924 / 2262 [R(int) = 0.0443]              |                      |
| Completeness to theta = 67.679    | 99.9 %                                      |                      |
| Refinement method                 | Full-matrix least-squares on F <sup>2</sup> |                      |
| Data / restraints / parameters    | 2262 / 0 / 156                              |                      |
| Goodness-of-fit on F <sup>2</sup> | 1.025                                       |                      |
| Final R indices [I>2sigma(I)]     | R1 = 0.0462, wR2 = 0.1139                   |                      |
| R indices (all data)              | R1 = 0.0652, wR2 = 0.1306                   |                      |
| Extinction coefficient            | n/a                                         |                      |
| Largest diff. peak and hole       | 0.369 and -0.577 e.Å <sup>-3</sup>          |                      |

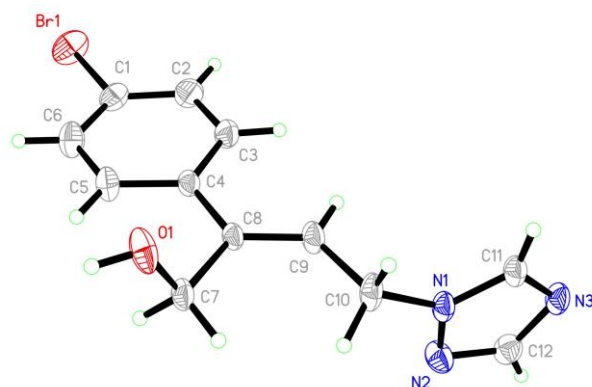

**Figure S1:** Molecular structure of **3i**

## References:

- (1) X. Sun, Z. Hong, M. Liu, S. Guo, D. Yang, Y. Wang, T. Lan, L. Gao, H. Qi, P. Gong and Y. Liu, *Bioorg. Med. Chem.*, 2017, **25**, 2800.
- (2) L. Wavrin and J. Viala, *Synthesis*, 2002, **2002**, 0326.
- (3) T. Ikawa, H. Sajiki and K. Hirota, *Tetrahedron*, 2005, **61**, 2217.

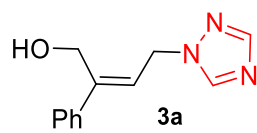

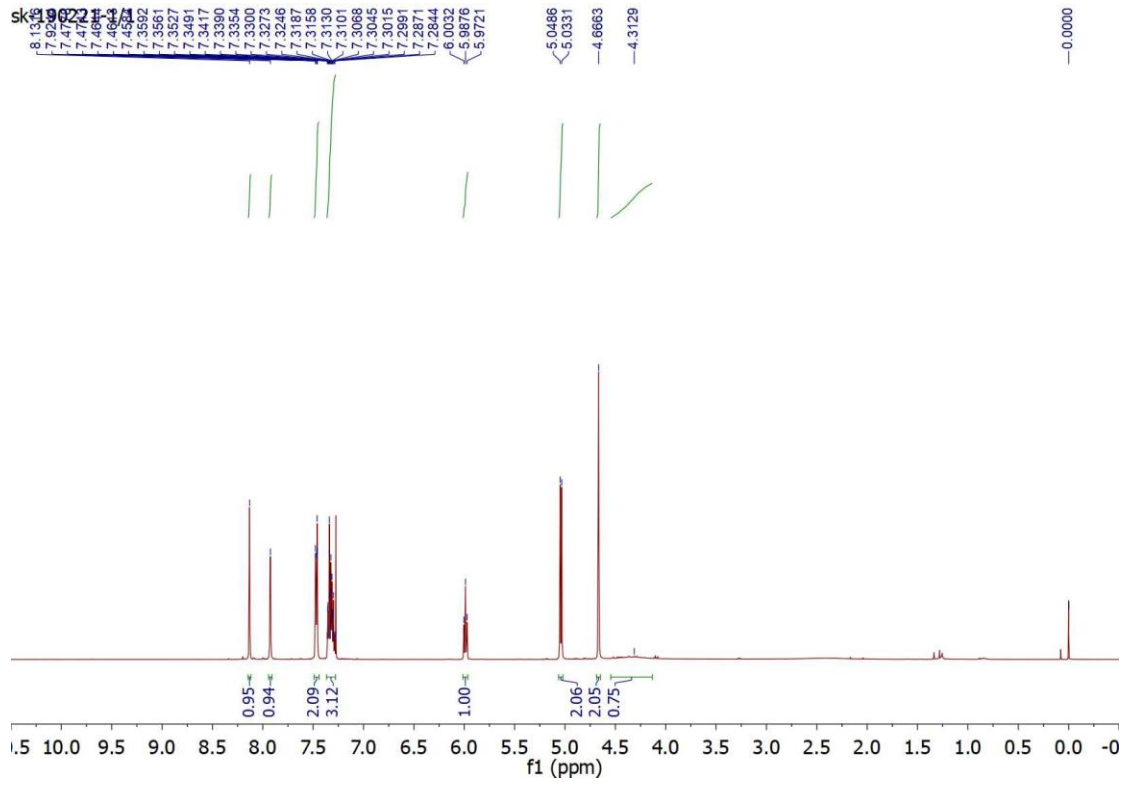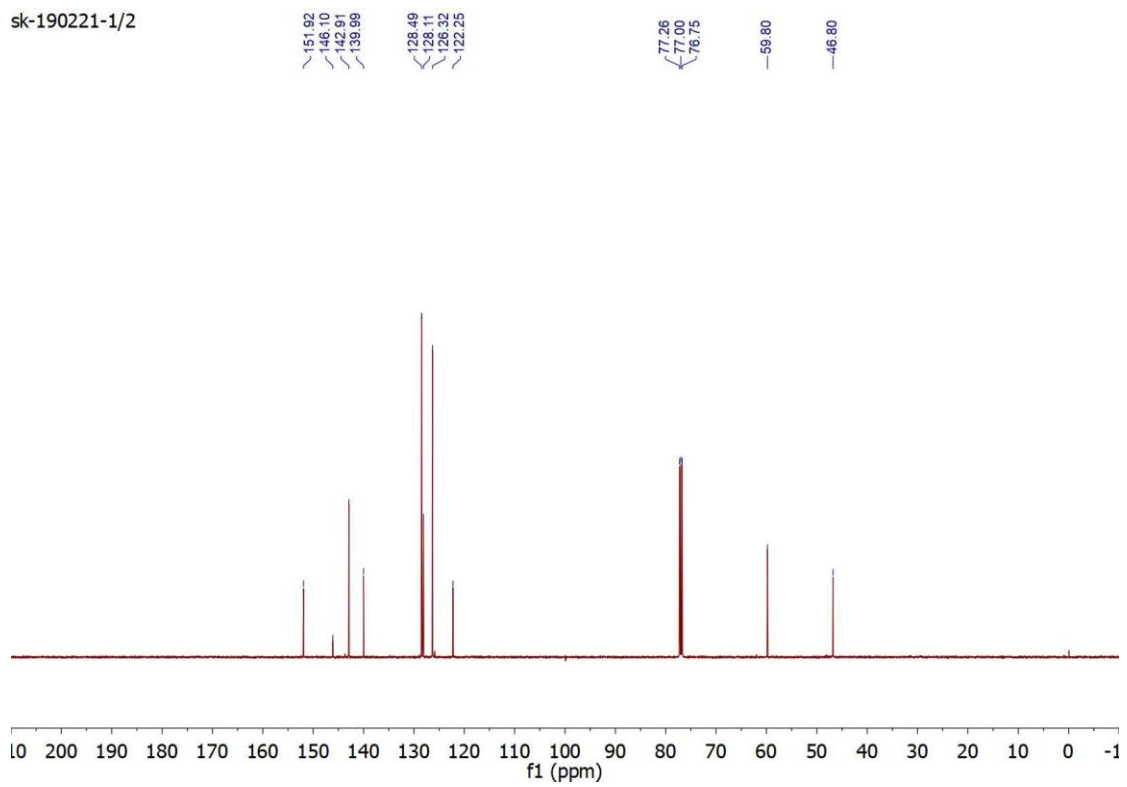

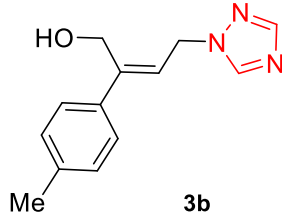

sk-181101-1/1

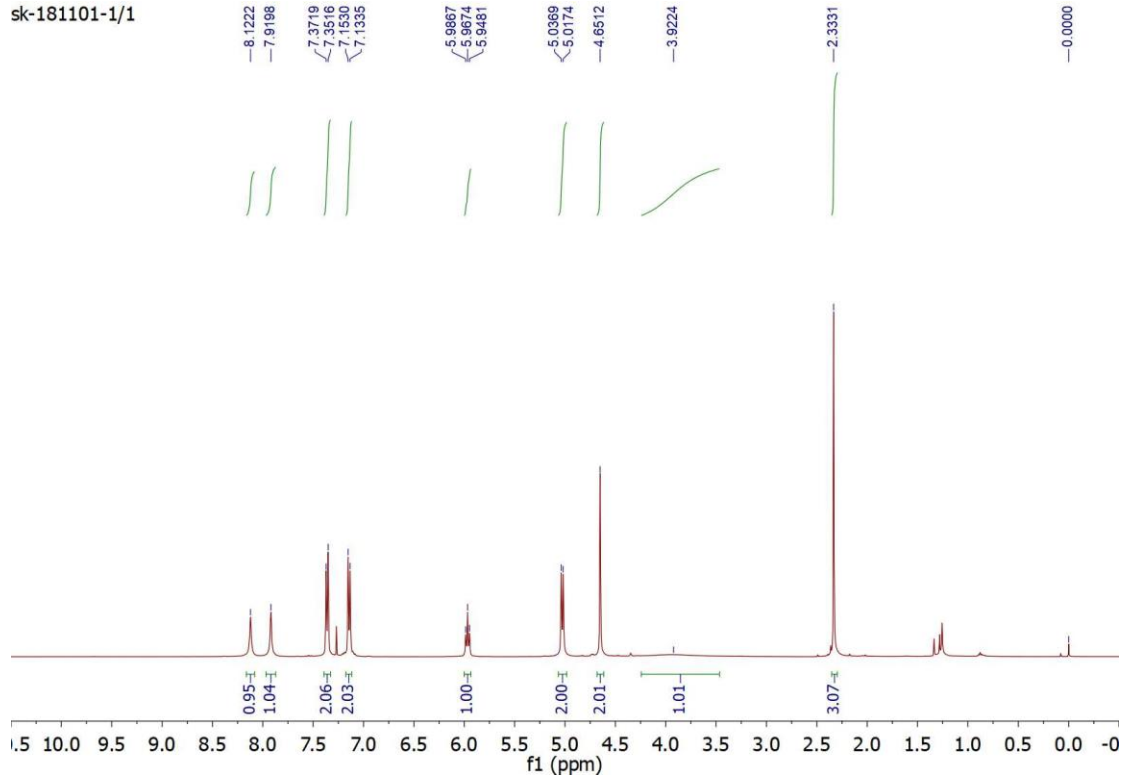

sk-181101-1/2

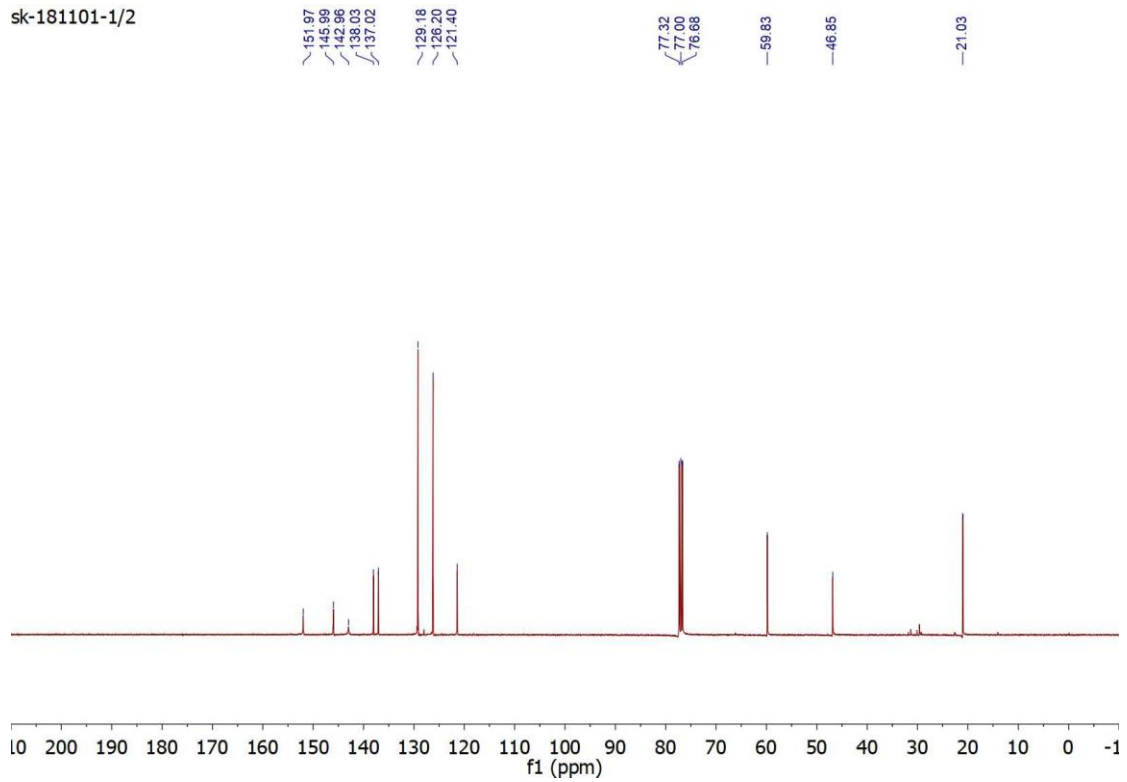

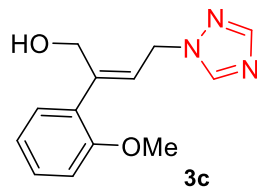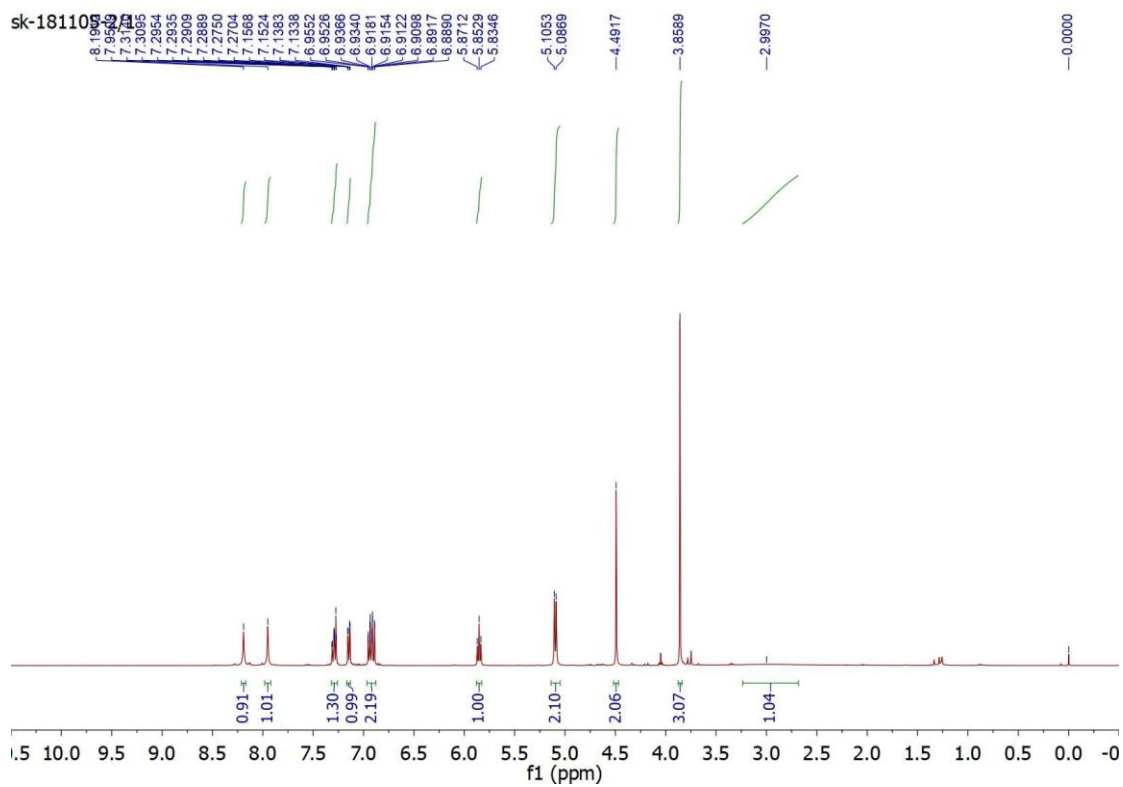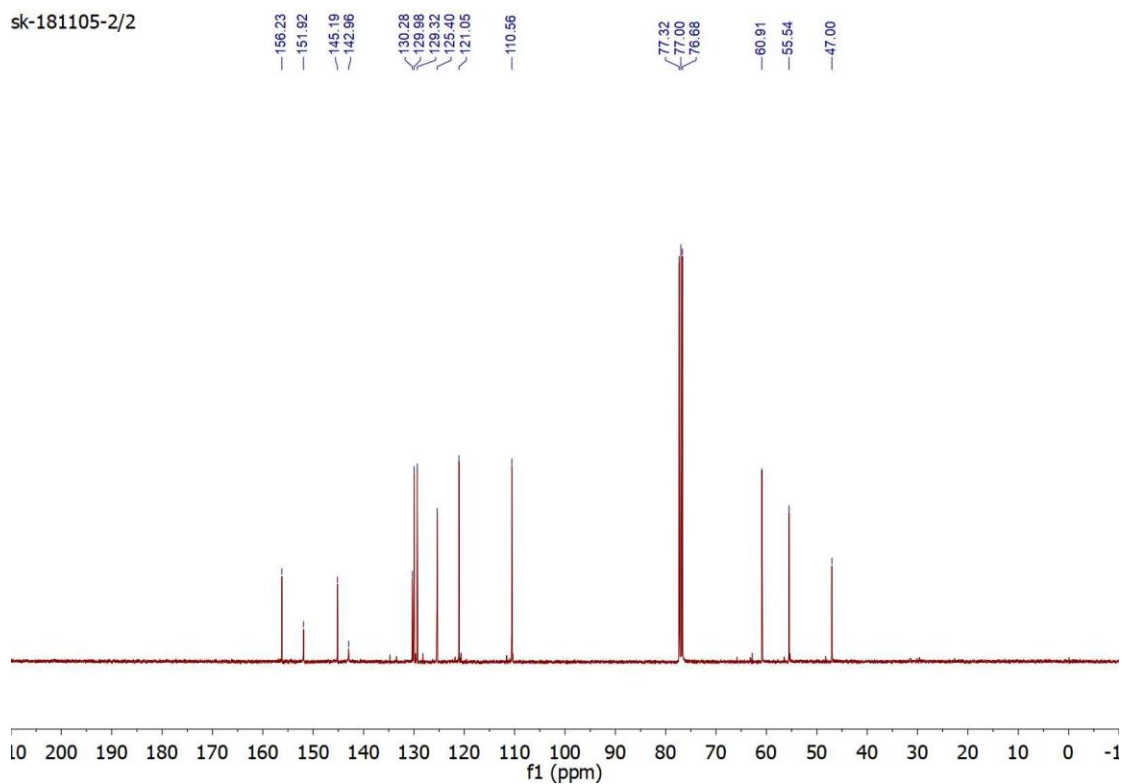



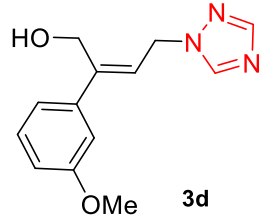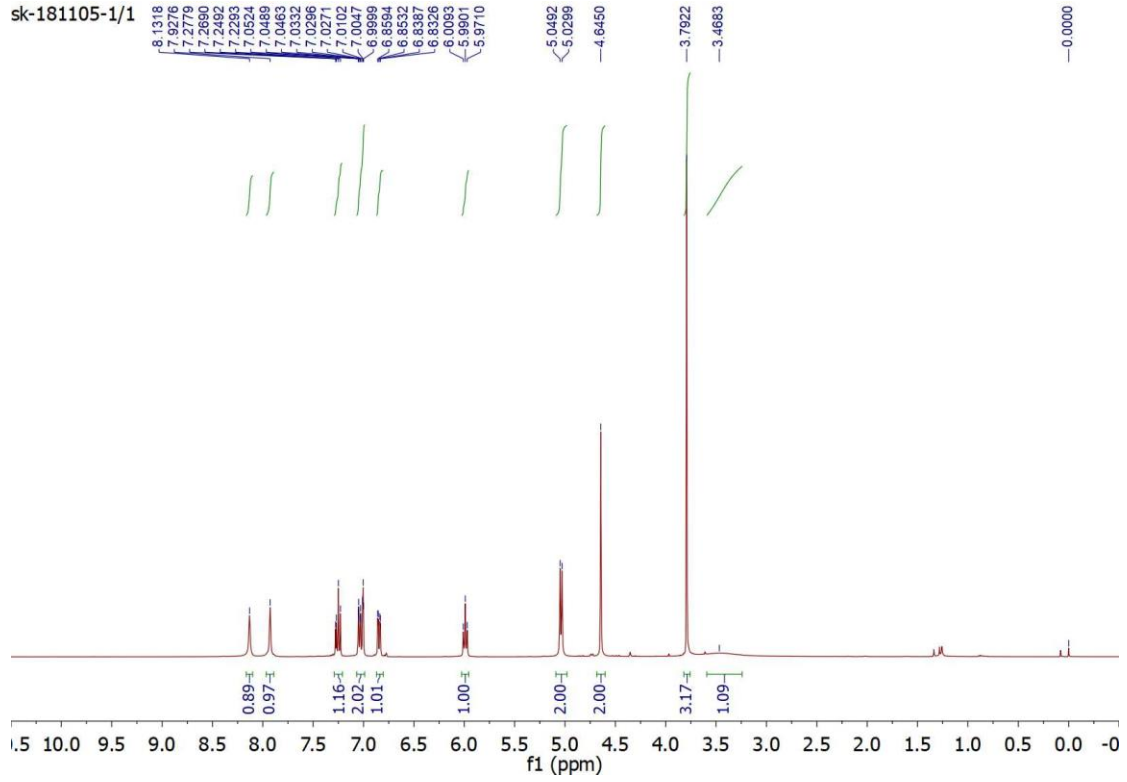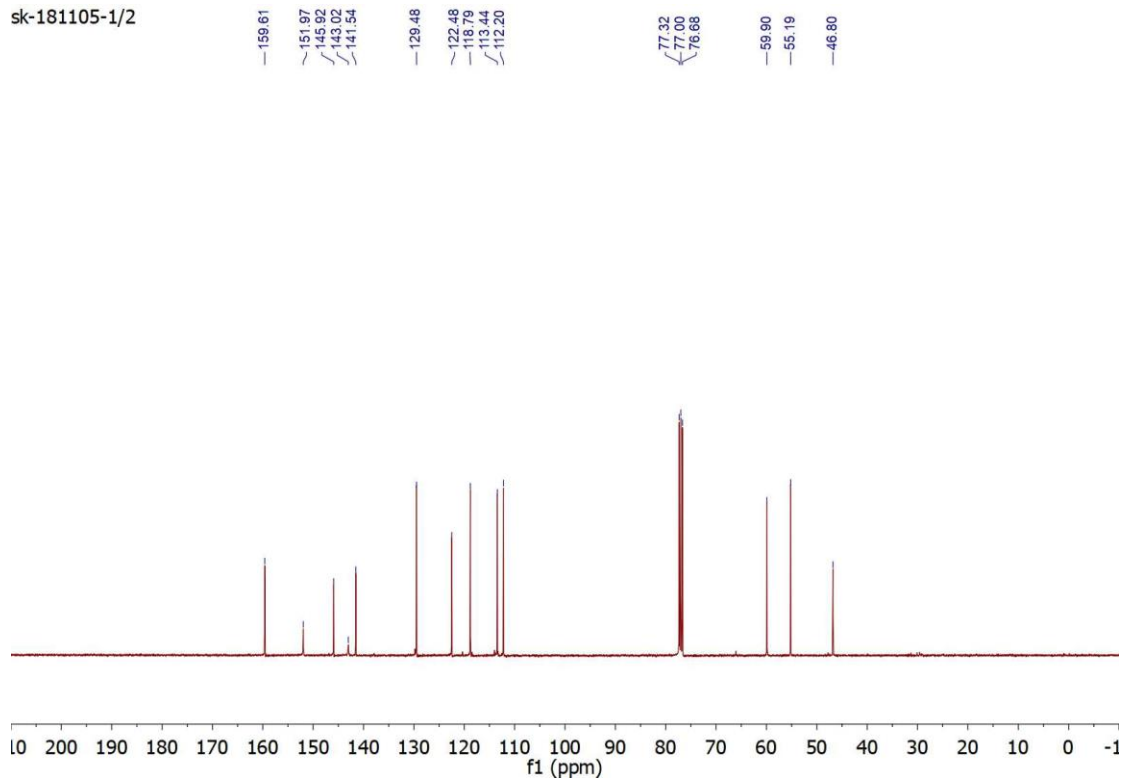

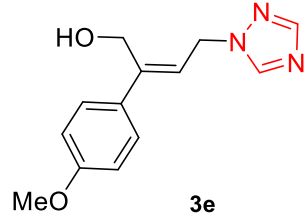

sk-190118-6/1

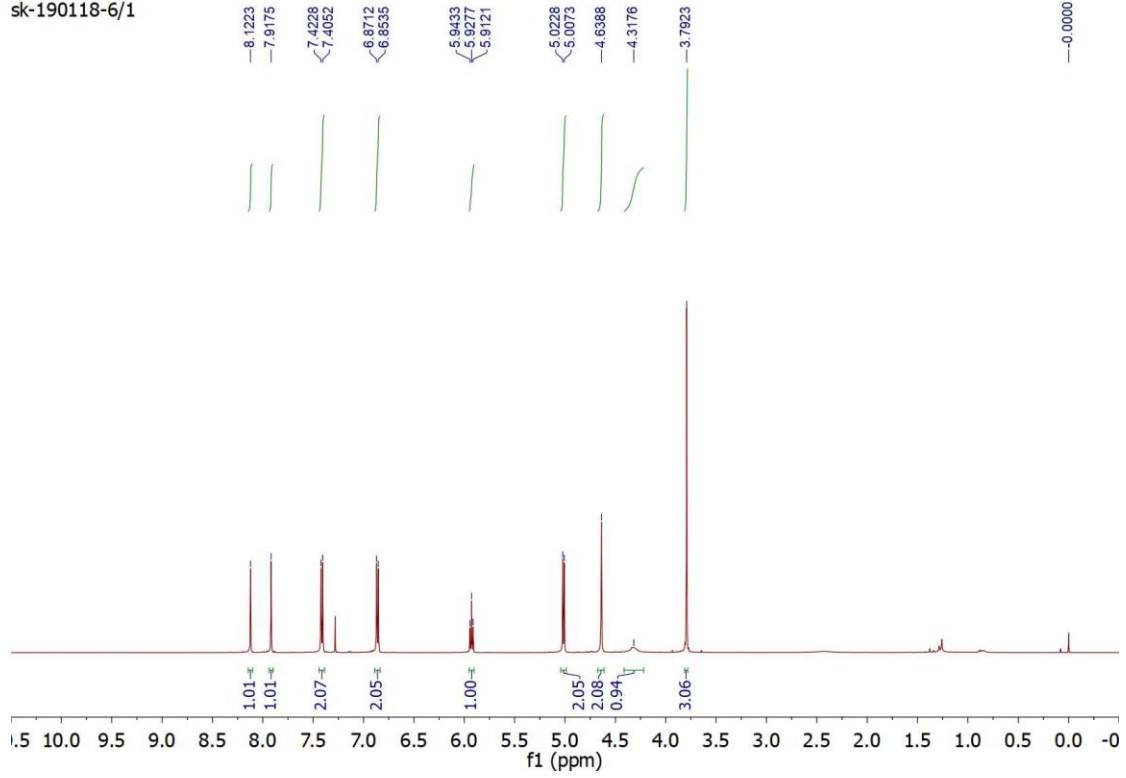

sk-190118-6/2

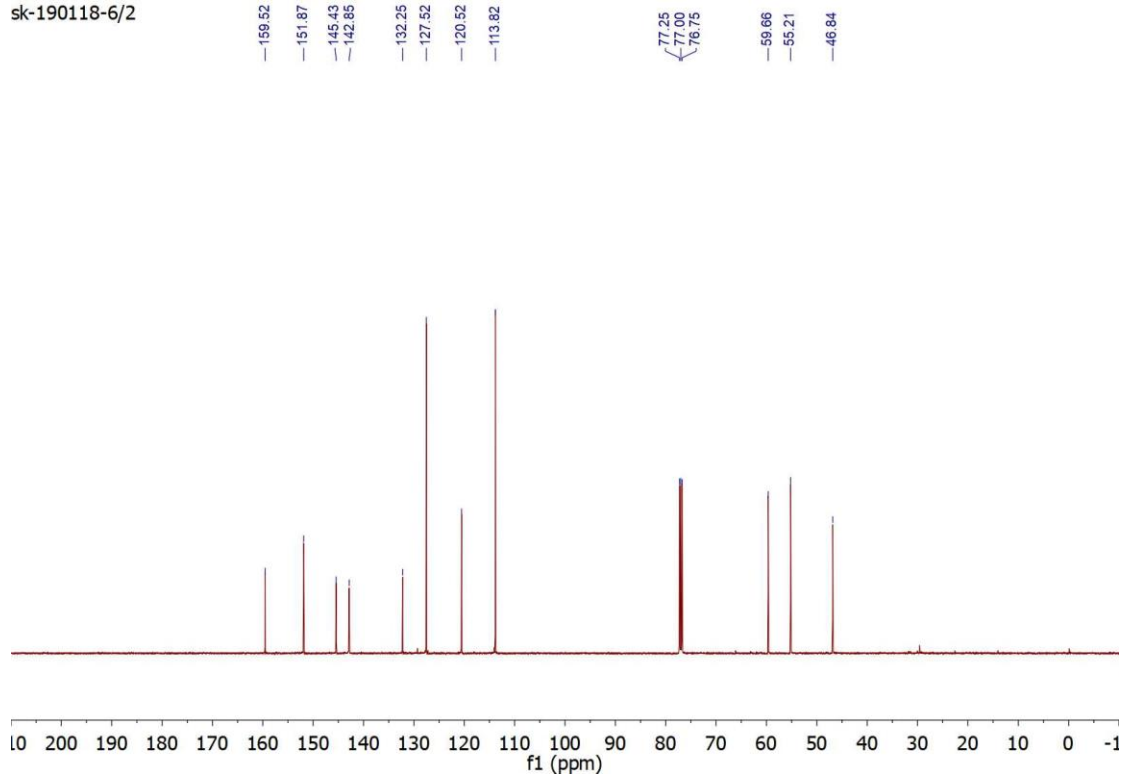

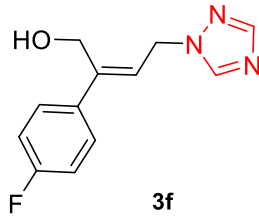

sk-190118-5/1

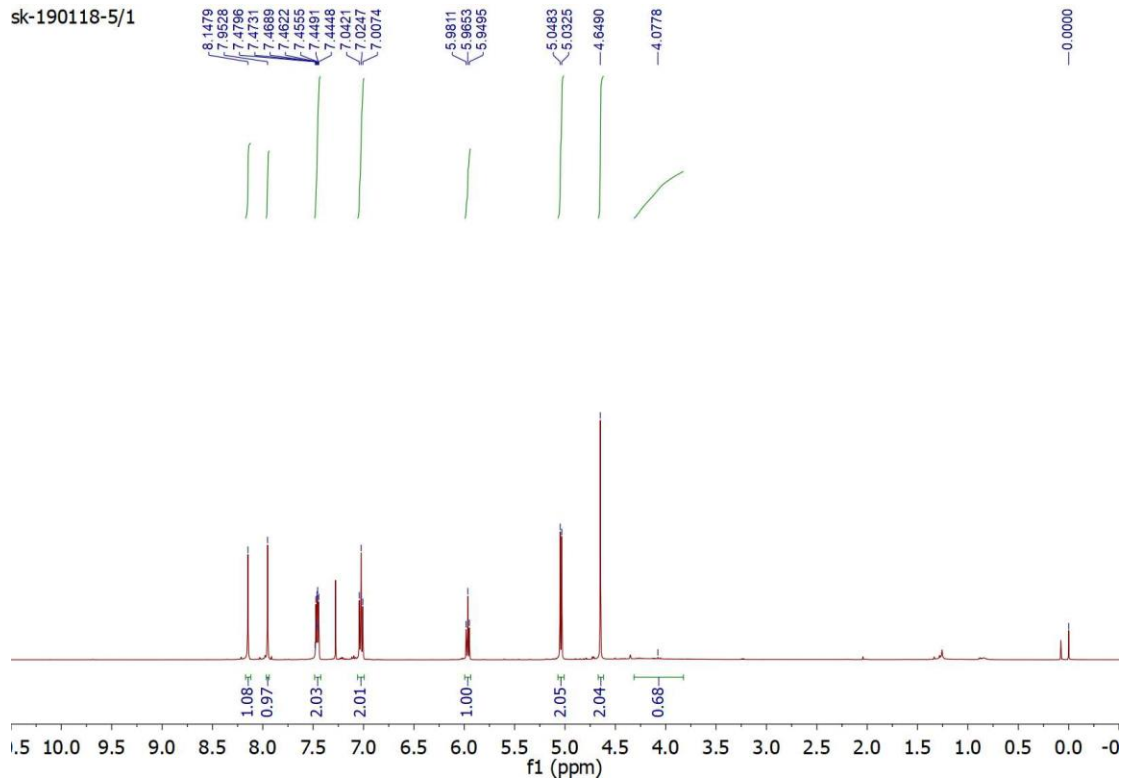

sk-190118-5/2

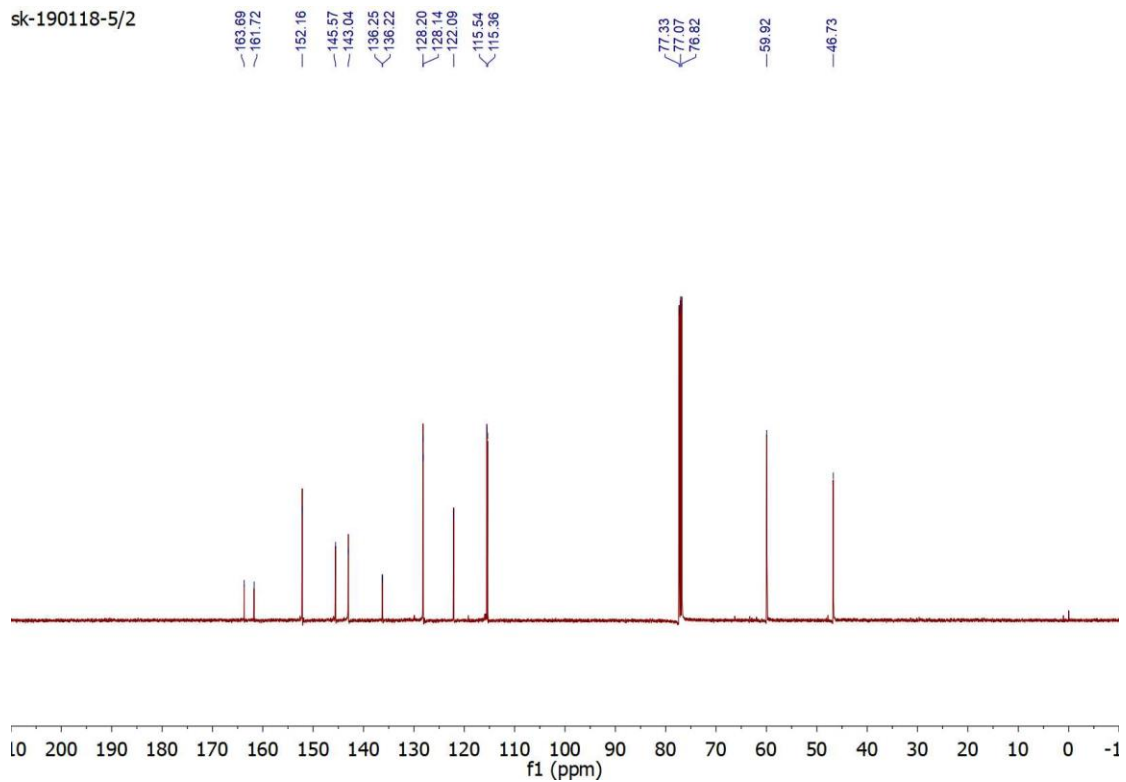

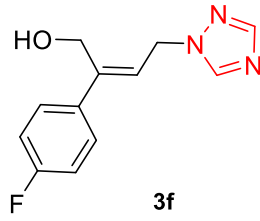

<sup>19</sup>F NMR spectrum for **3f**

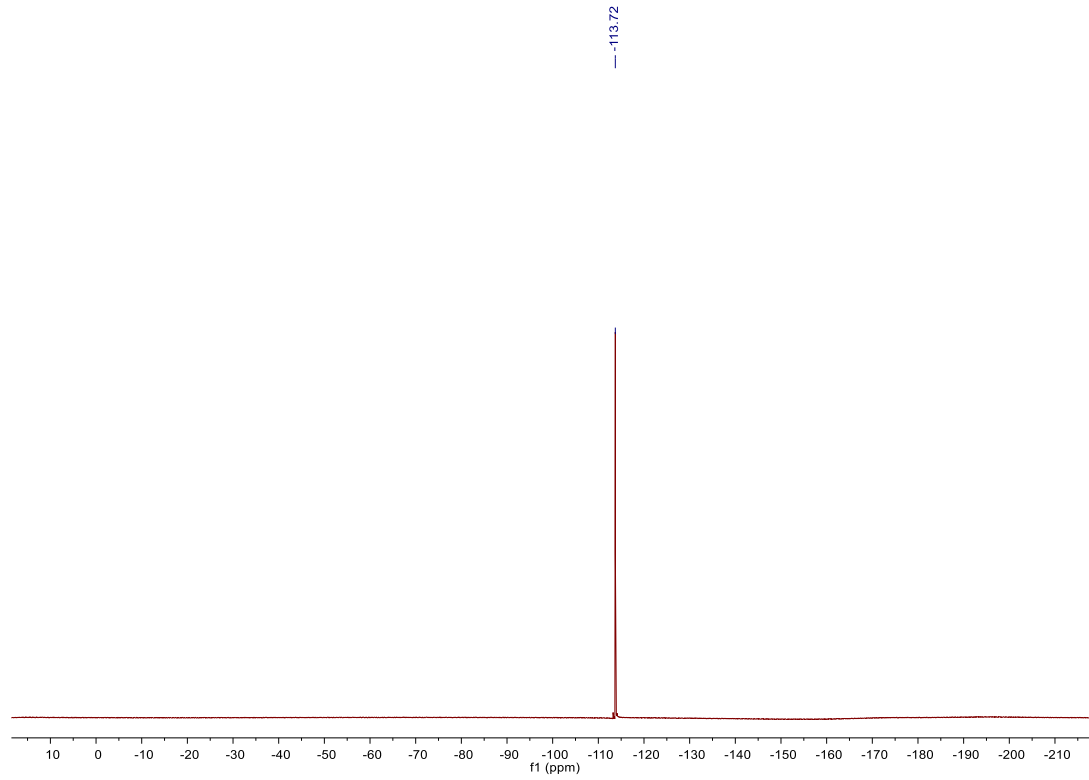

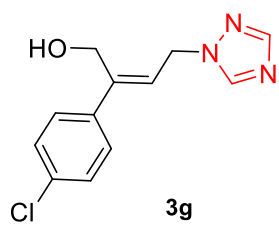

bh-181105-3/1

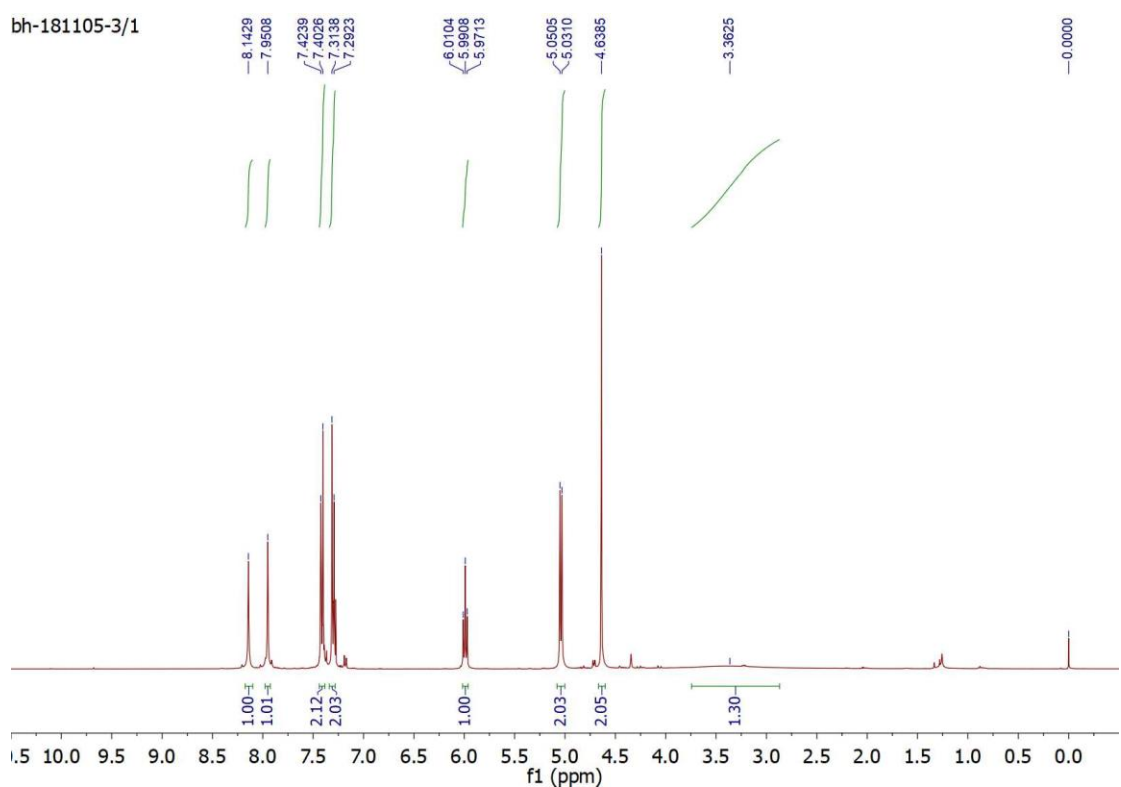

bh-181105-3/2

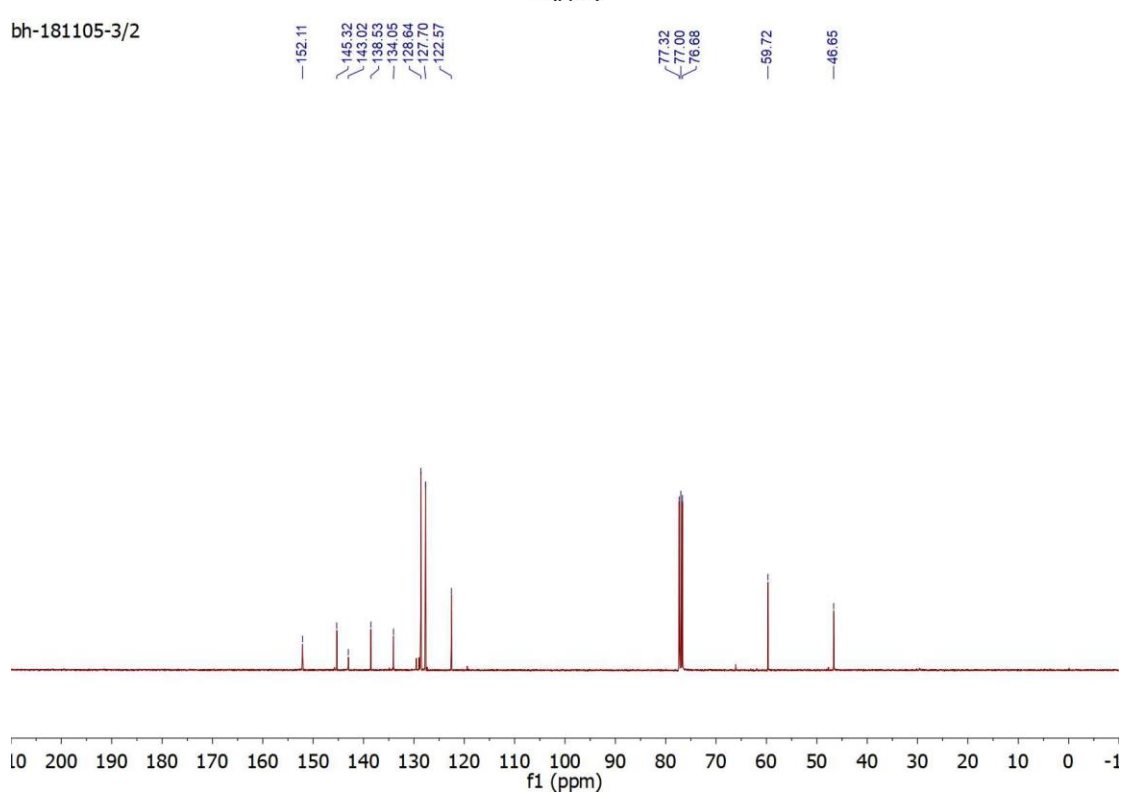

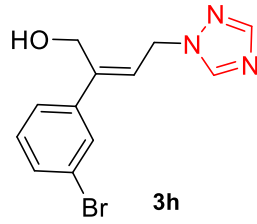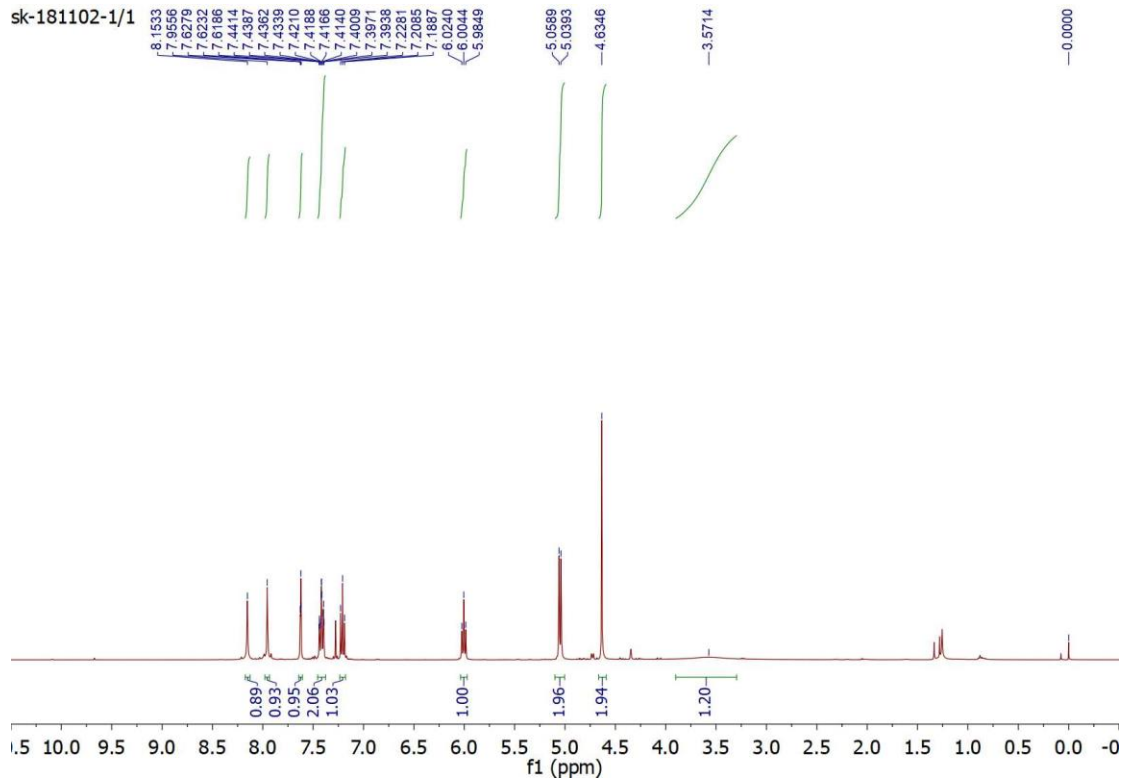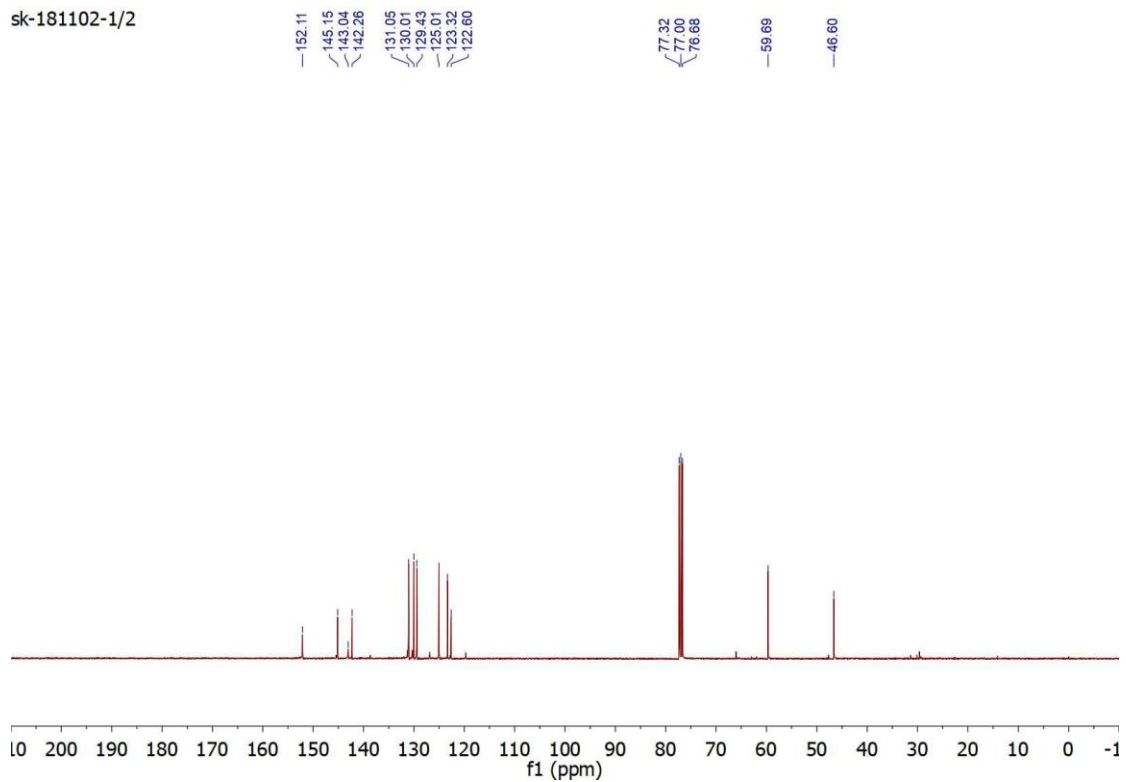

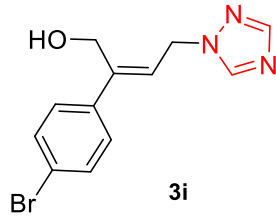

sk-190122-3/1

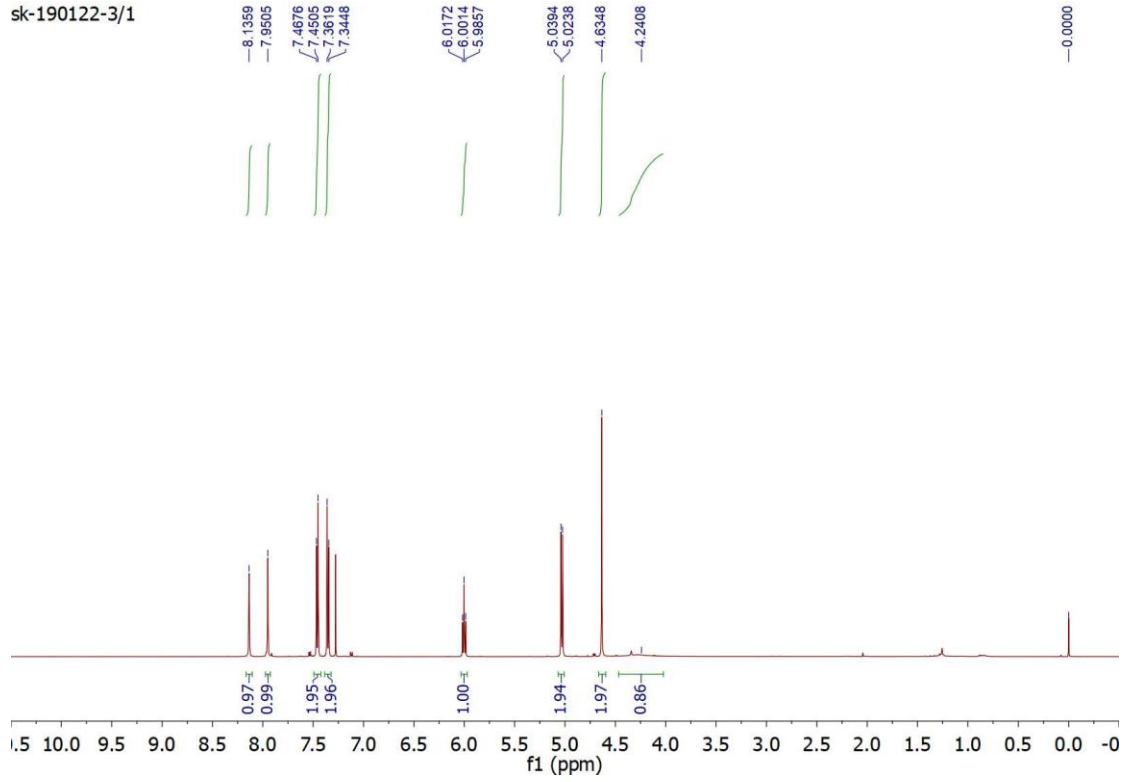

sk-190122-3/2

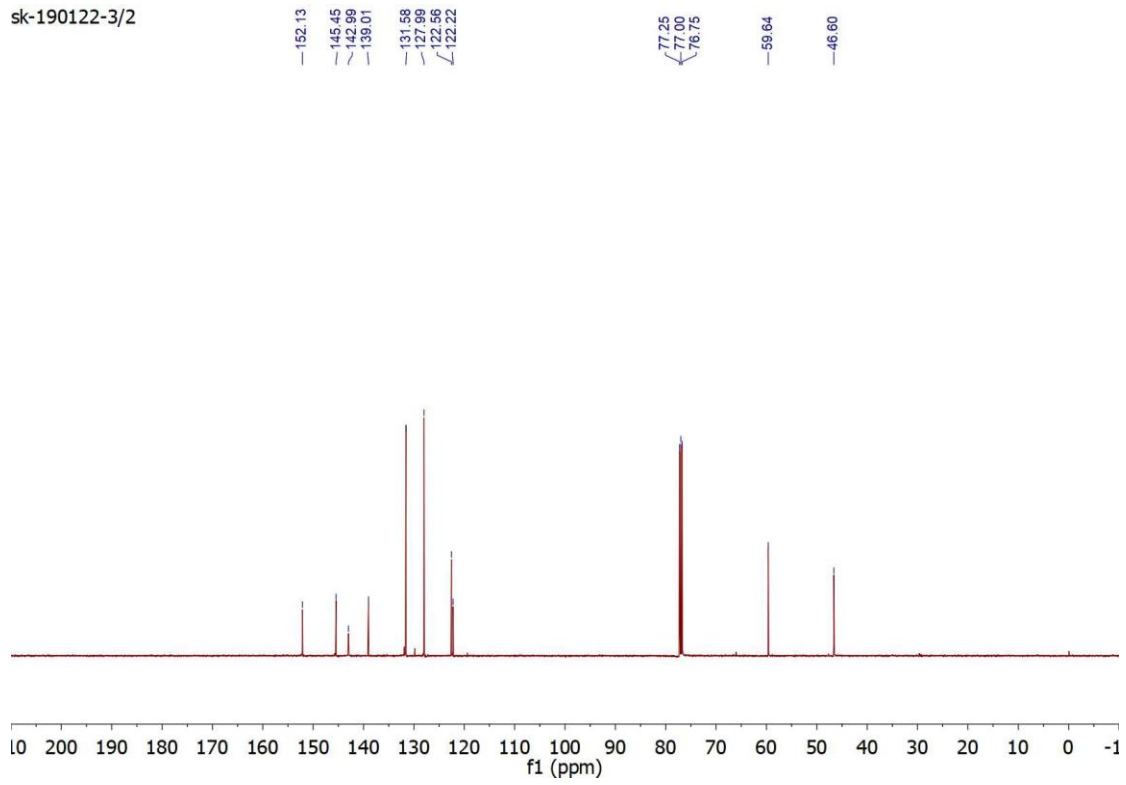

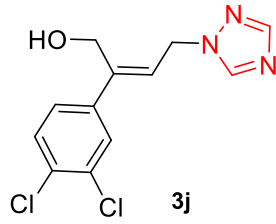

bh-181105-4/1

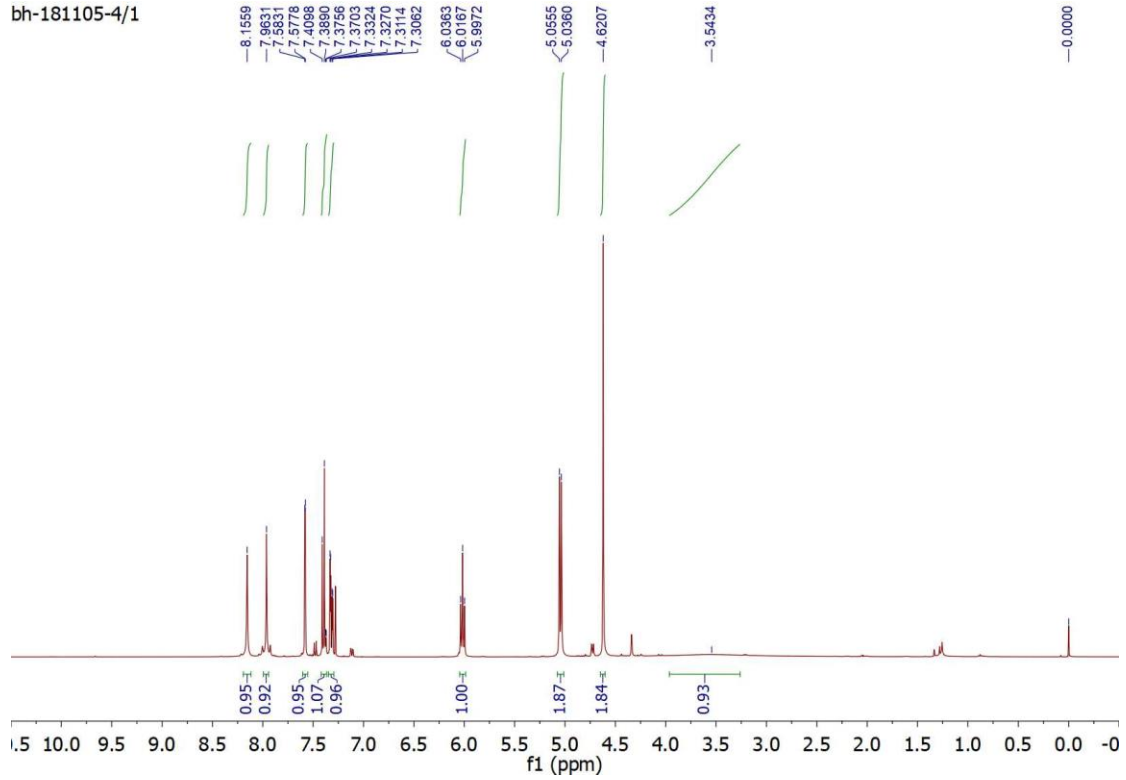

bh-181105-4/2

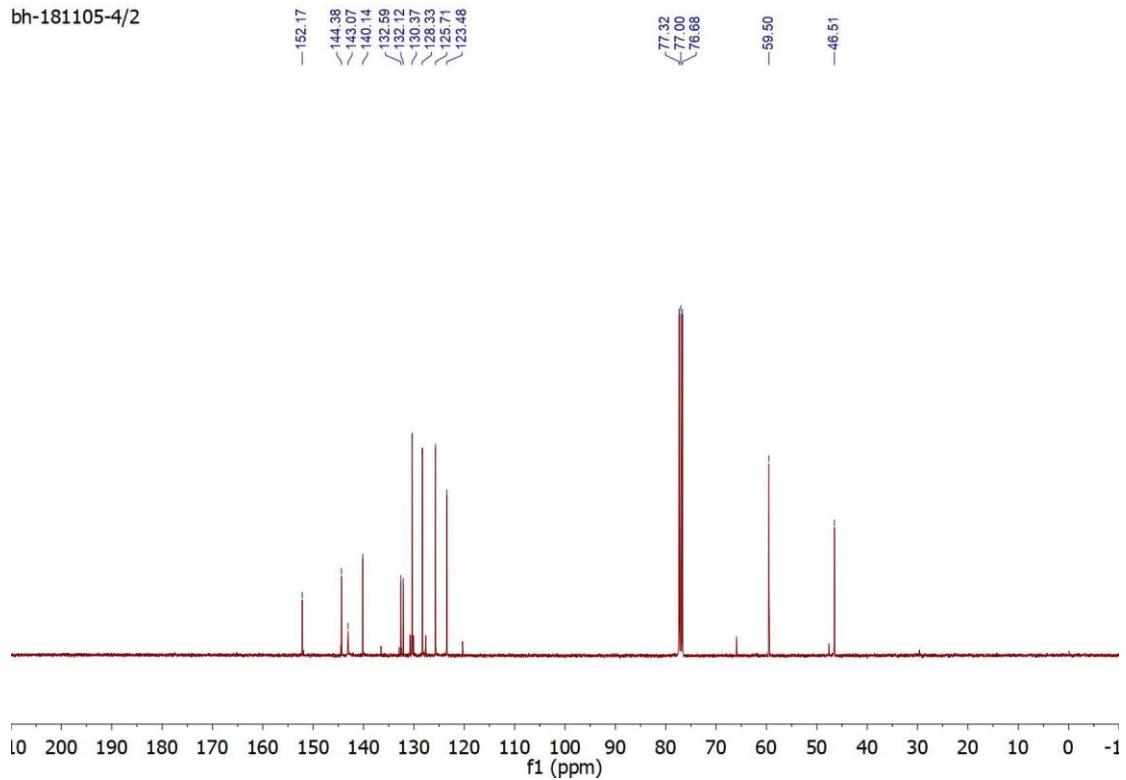



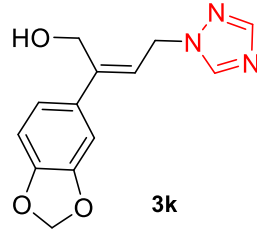

sk-181110-1/1

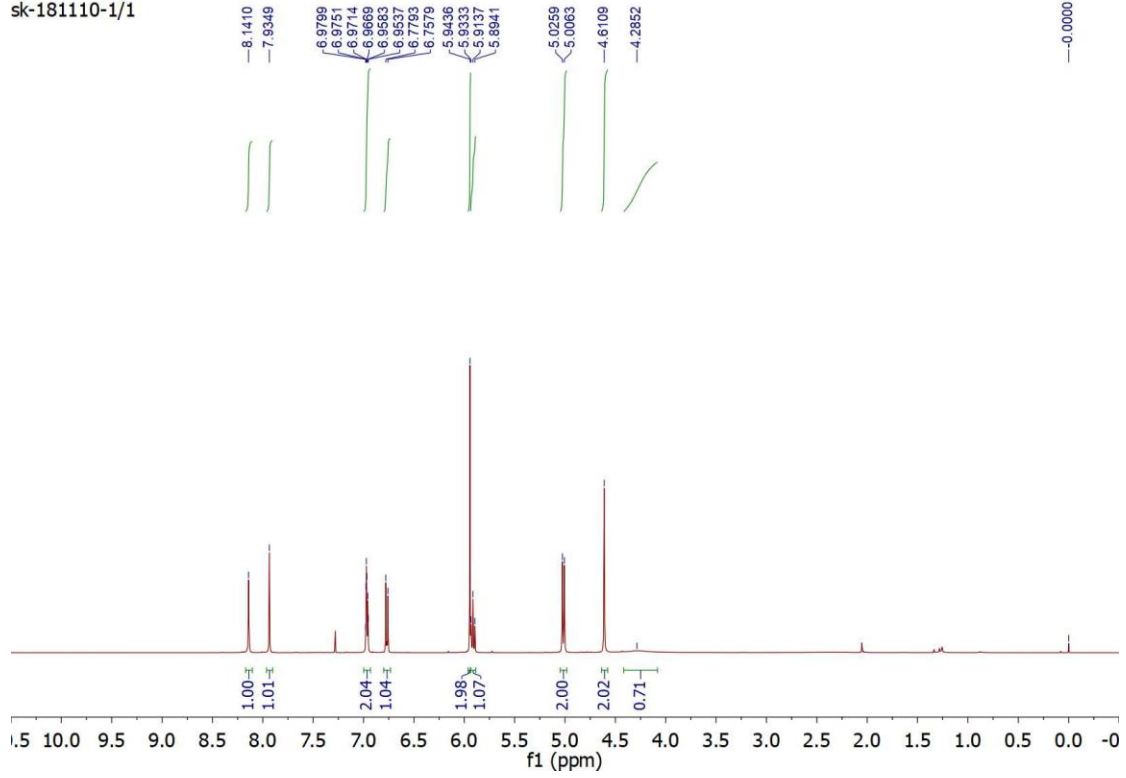

sk-181110-1/2

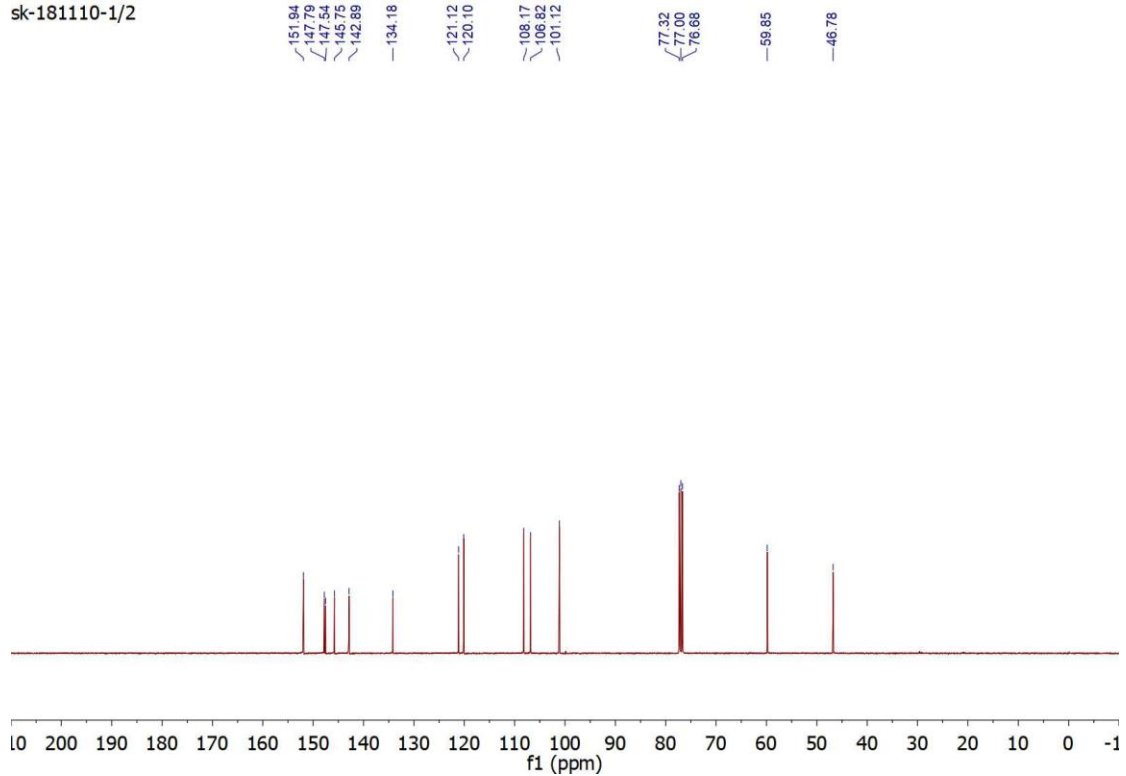

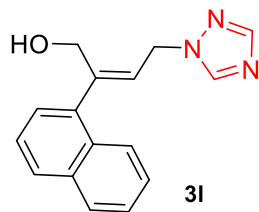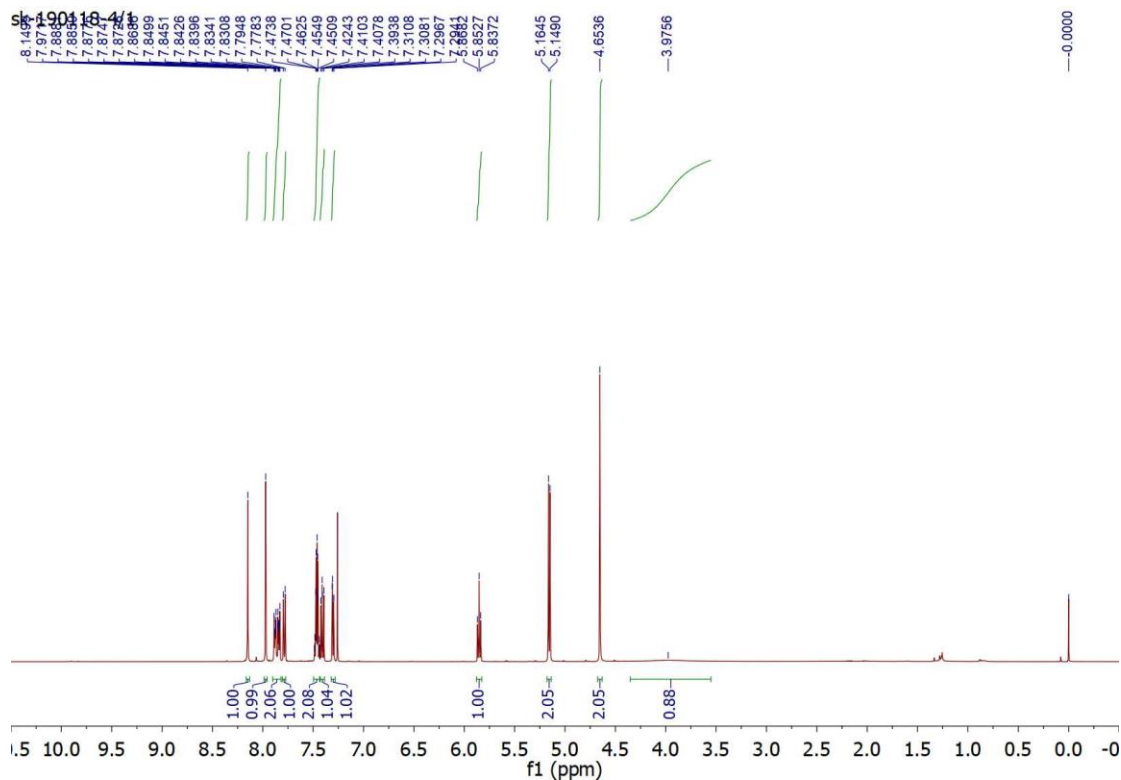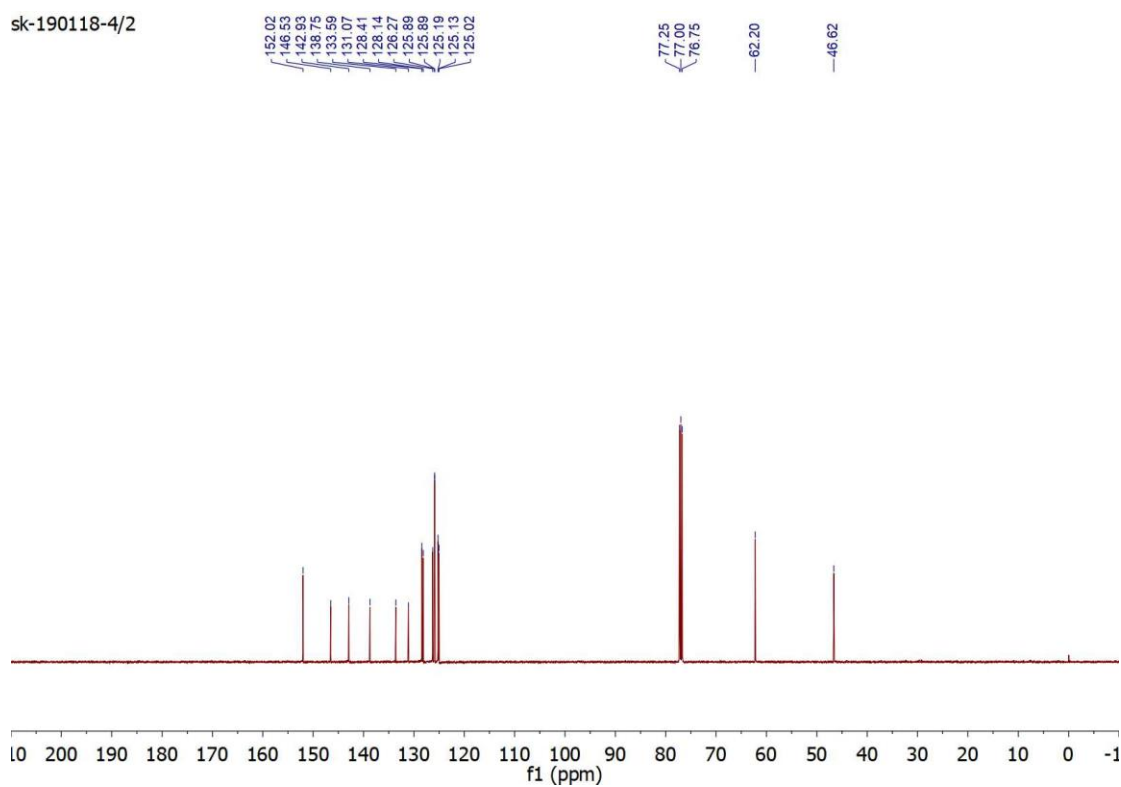

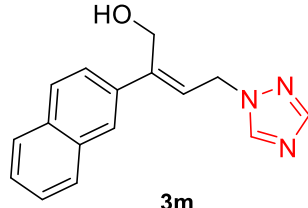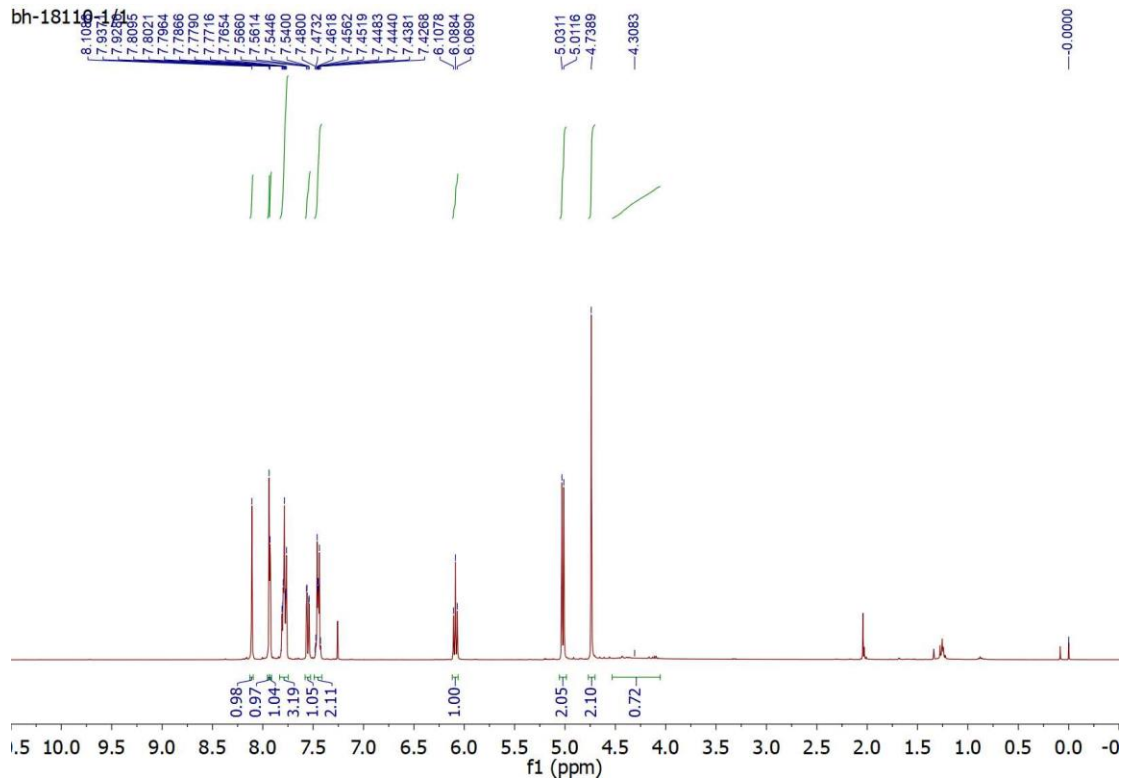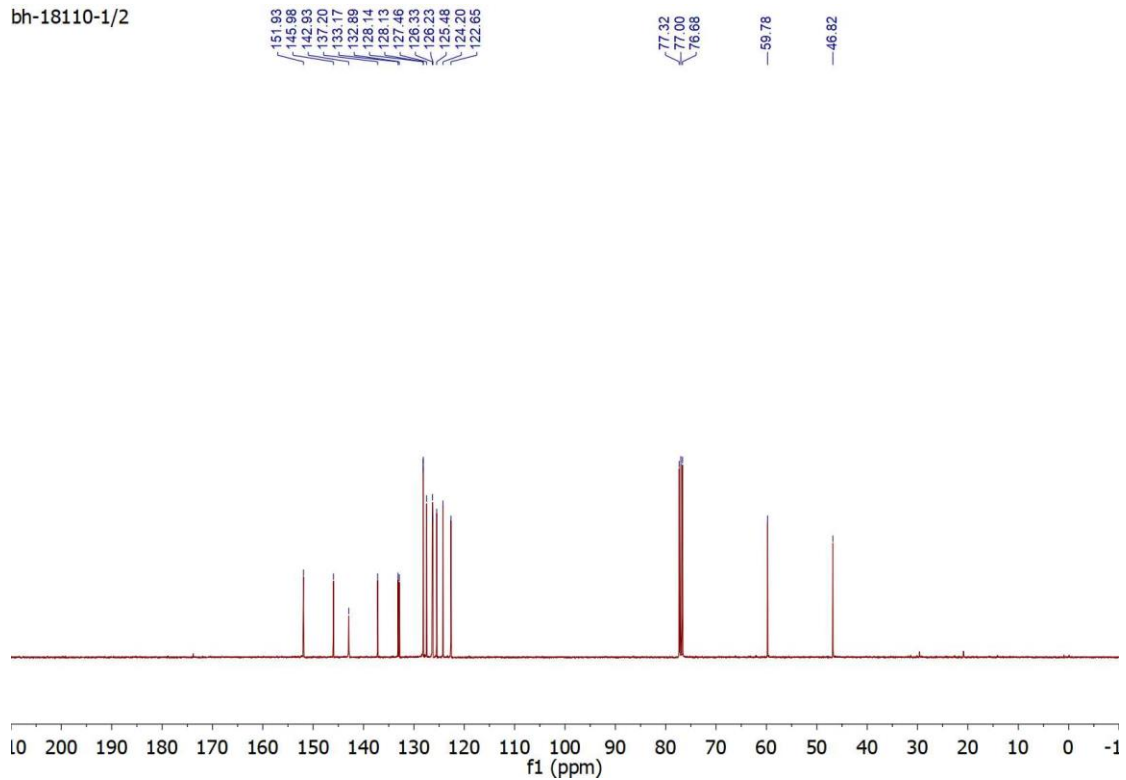

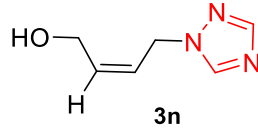

bh-181107-2/1

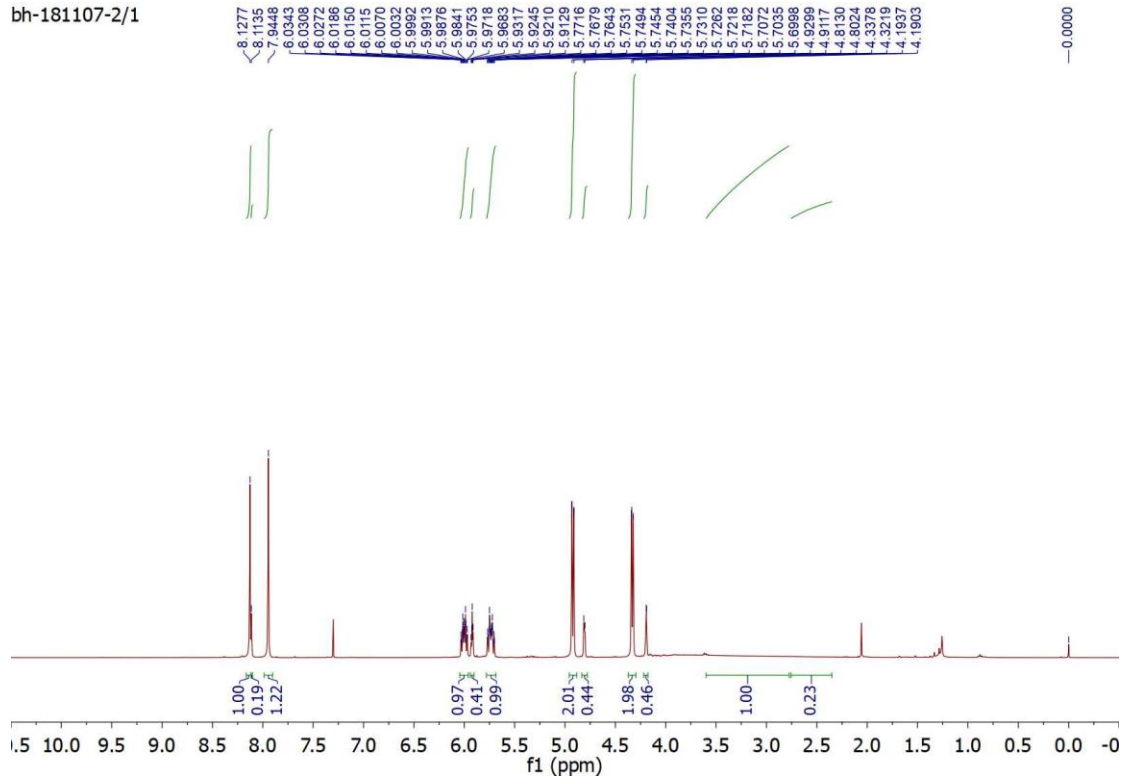

bh-181107-2/2

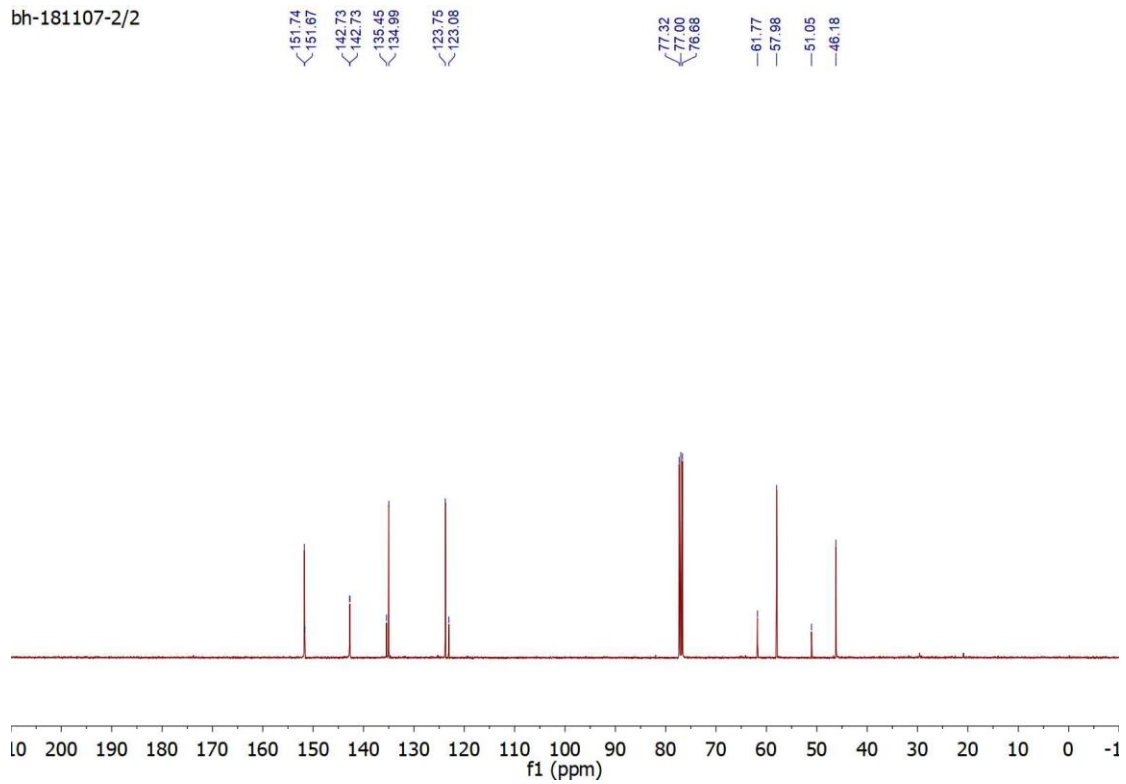

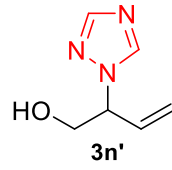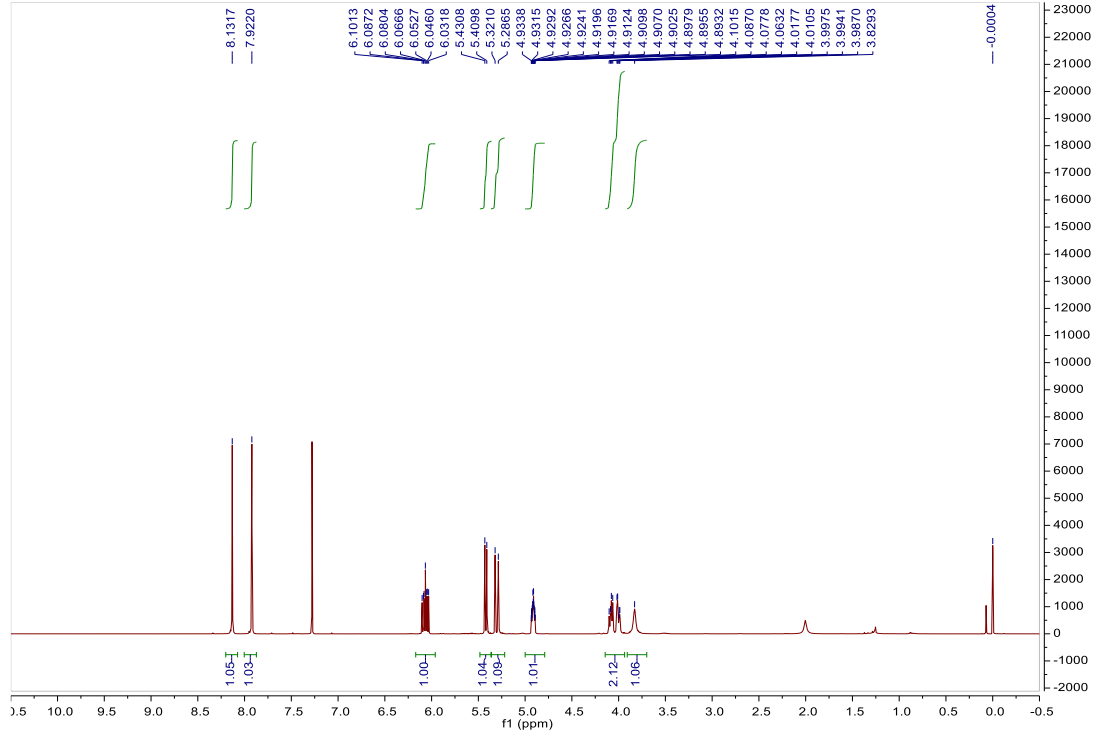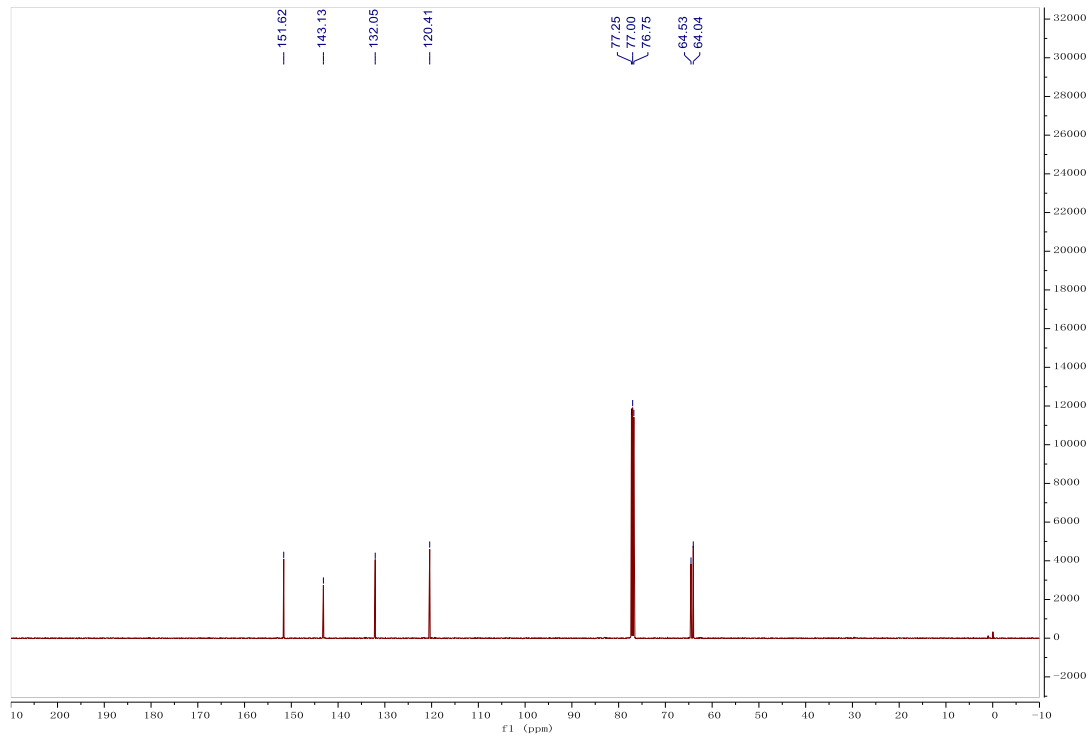

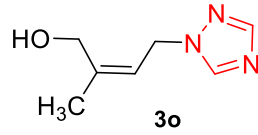

sk-190124-4/1

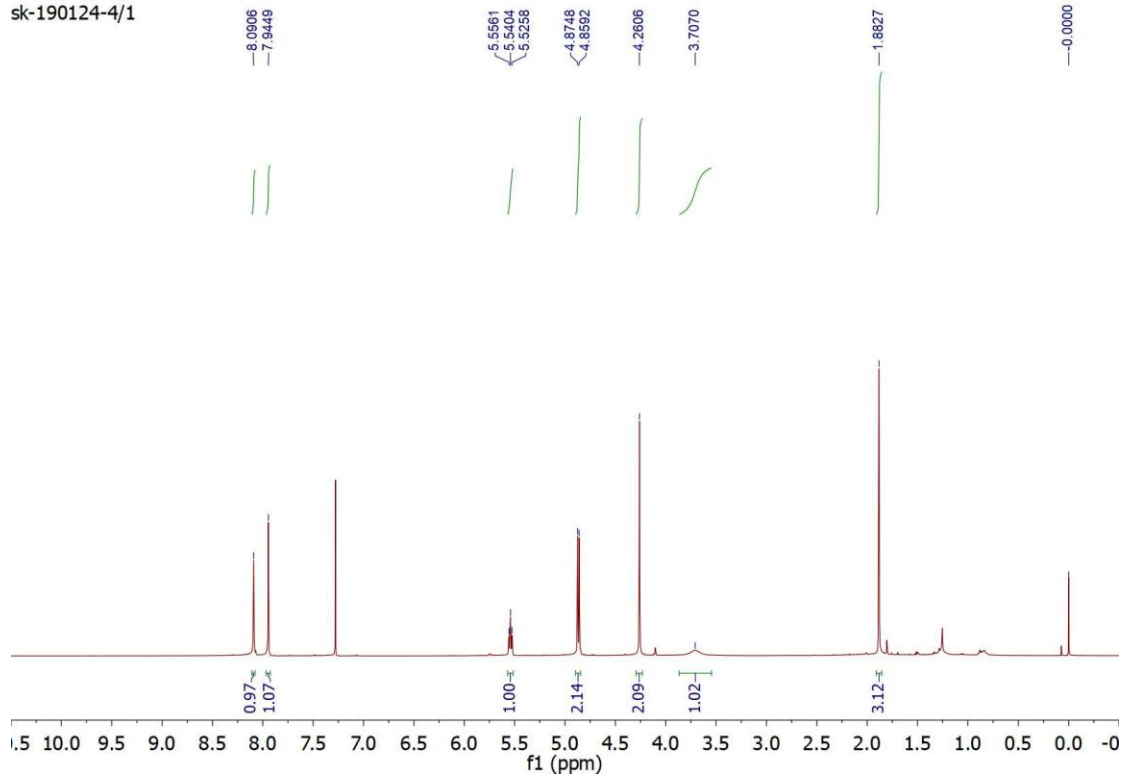

sk-190124-4/2

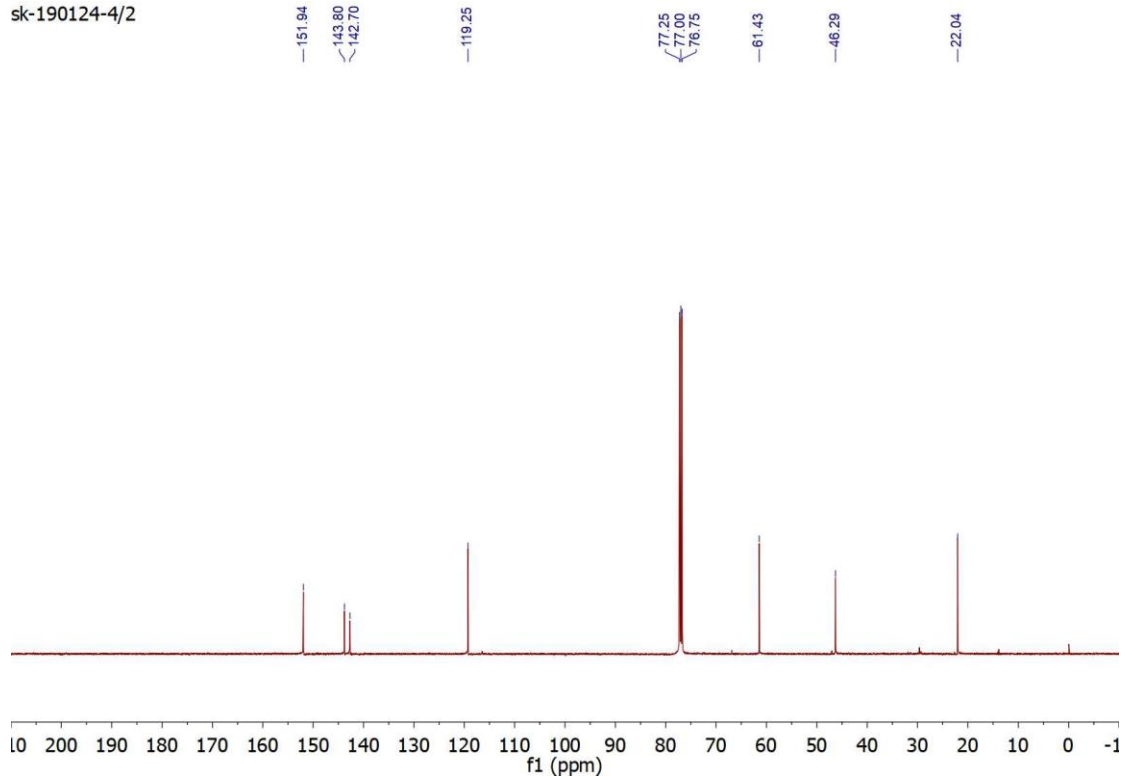

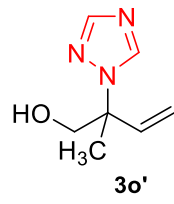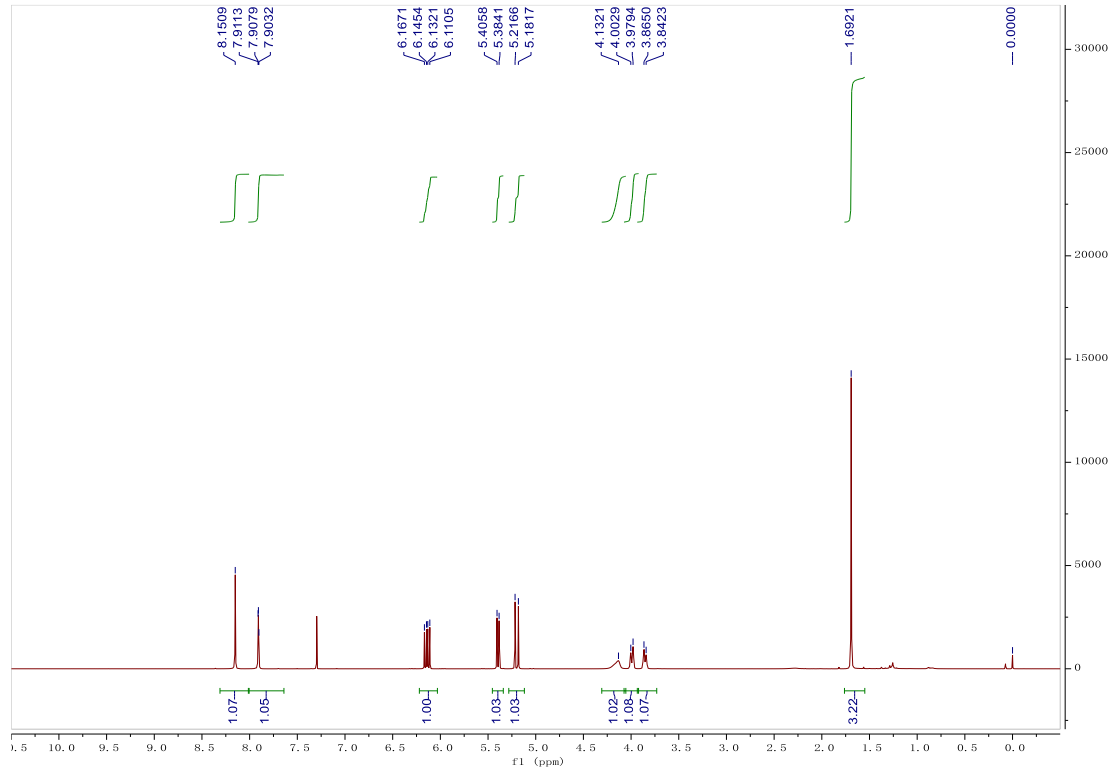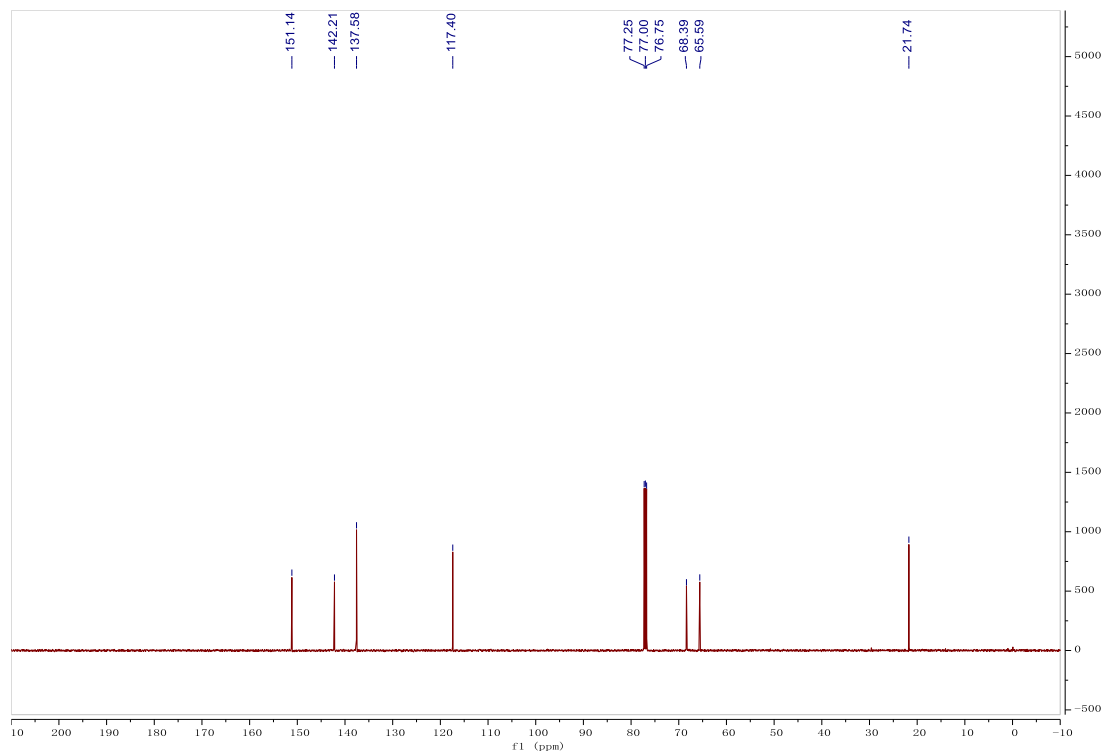

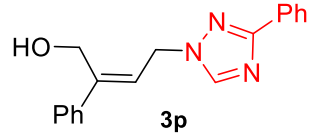

sk-190118-7/1

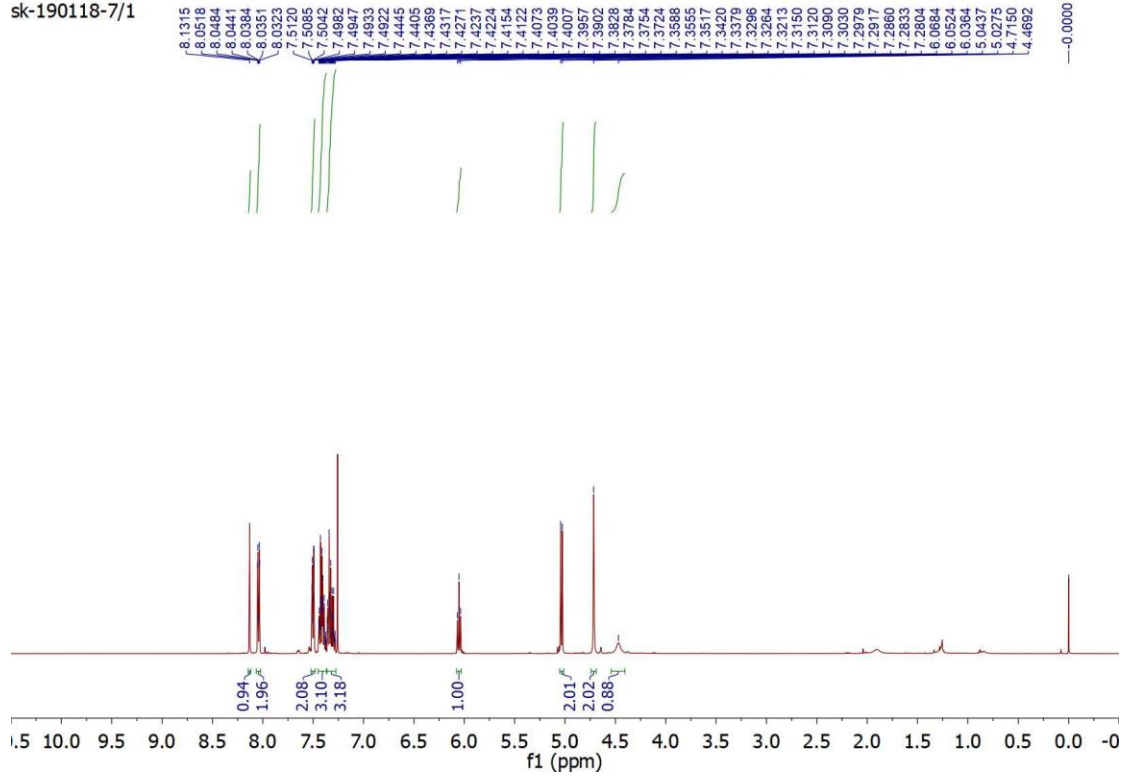

sk-190118-7/2

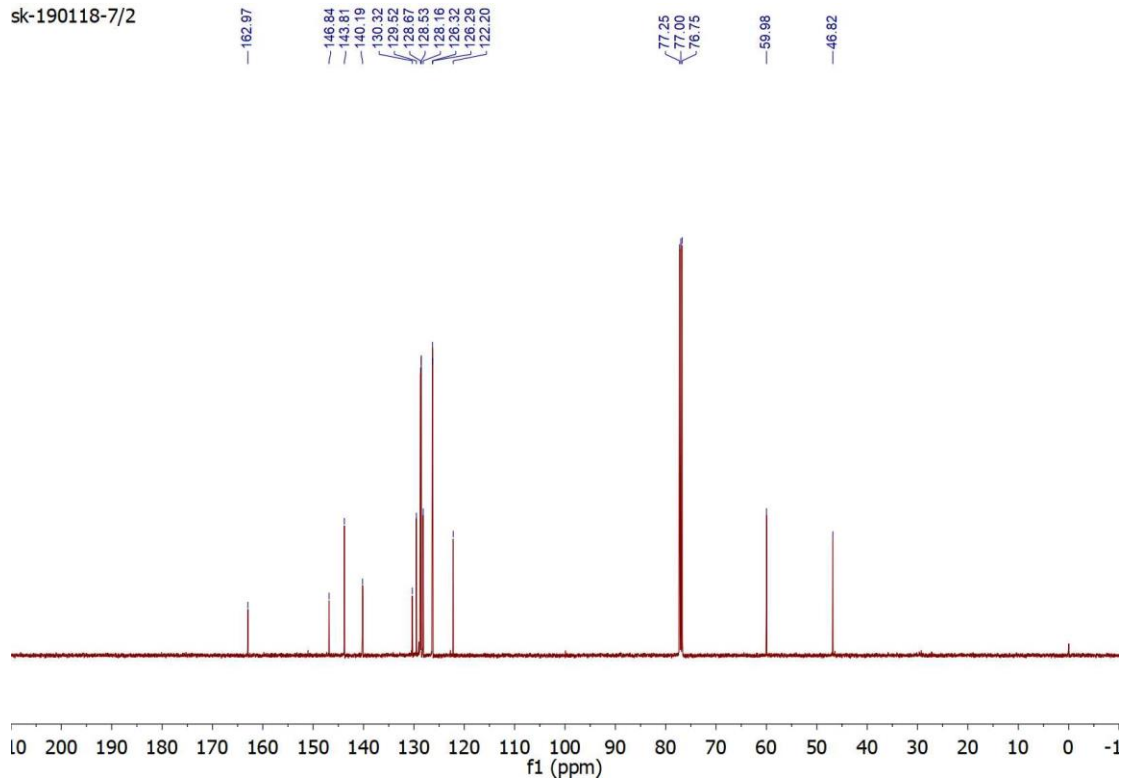



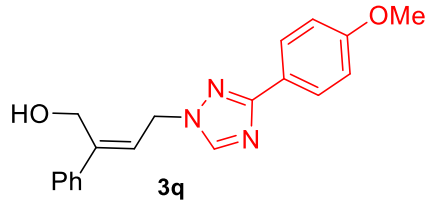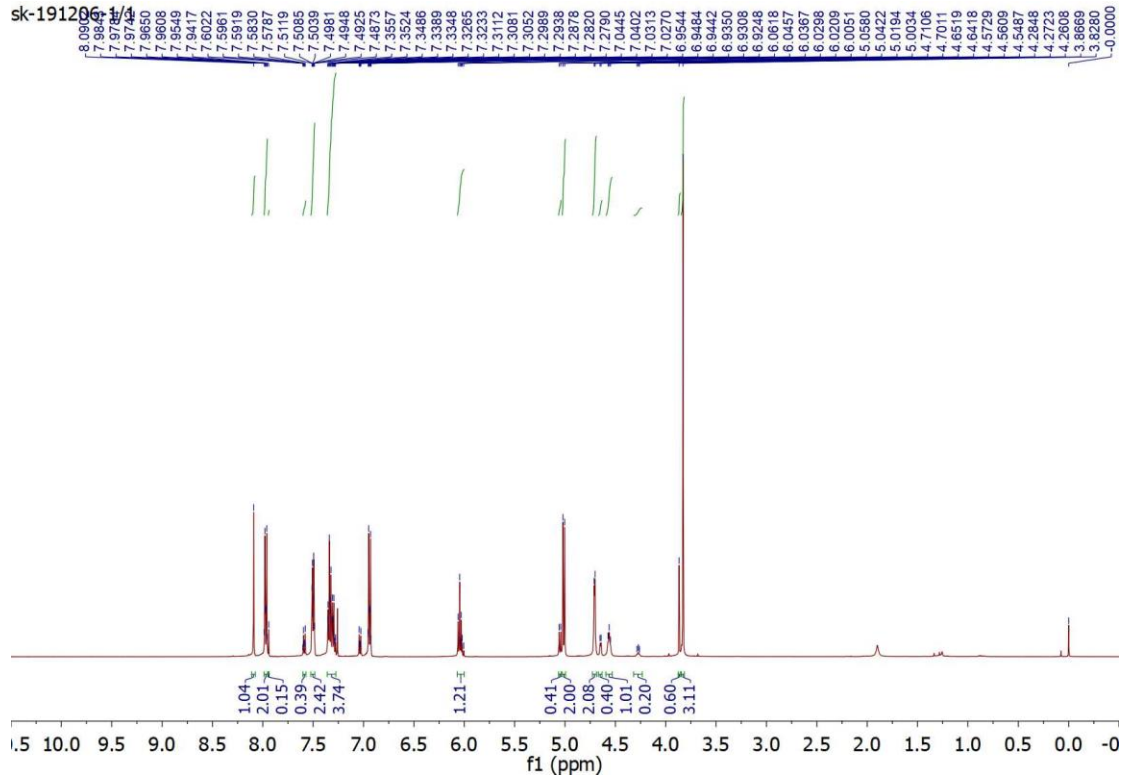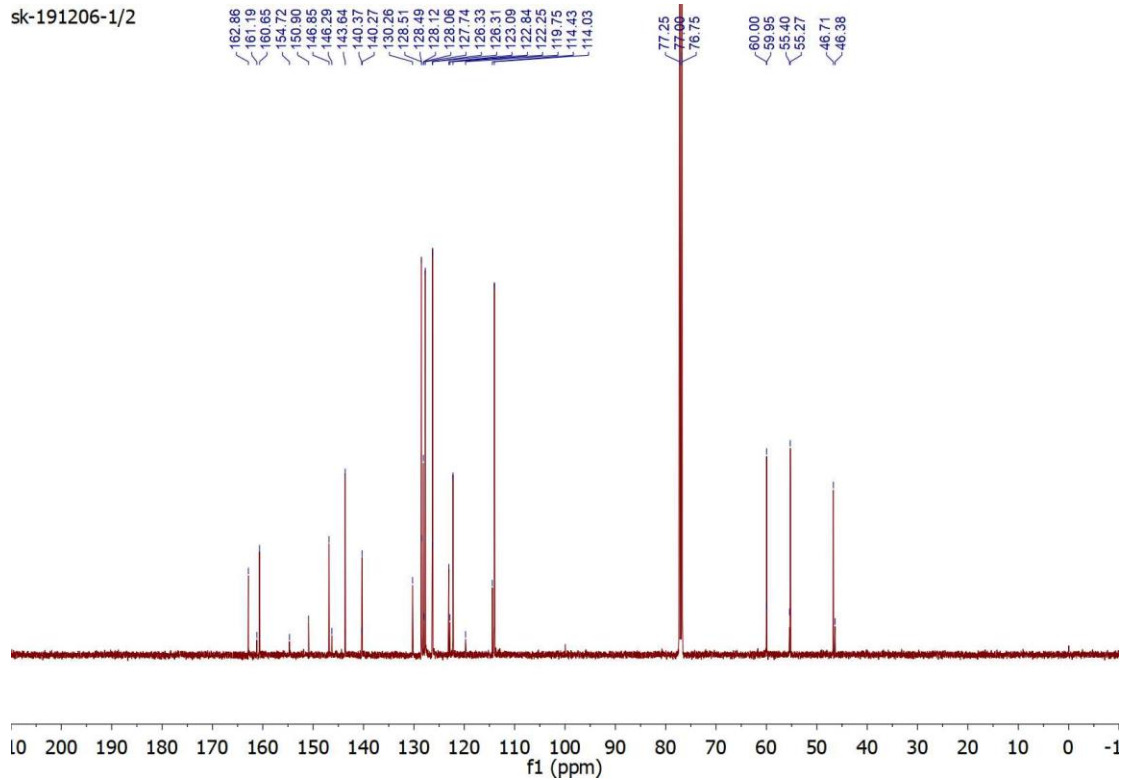

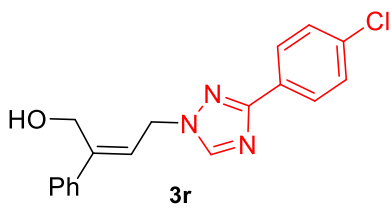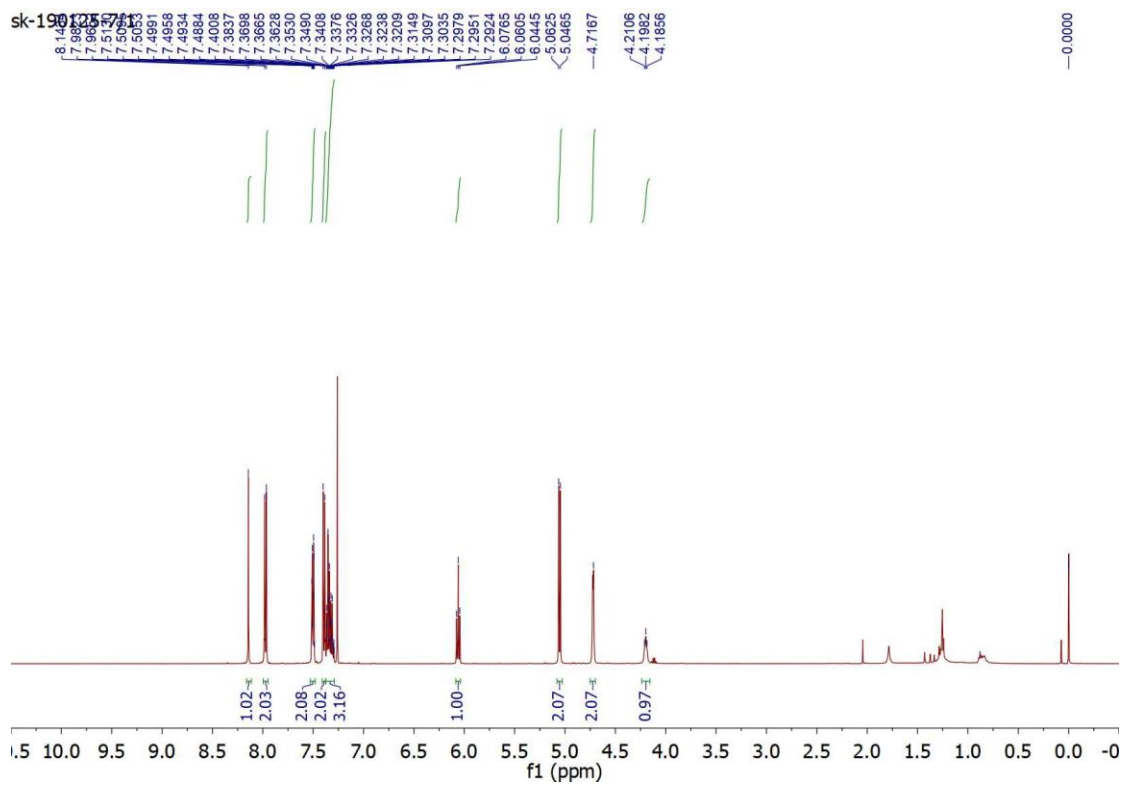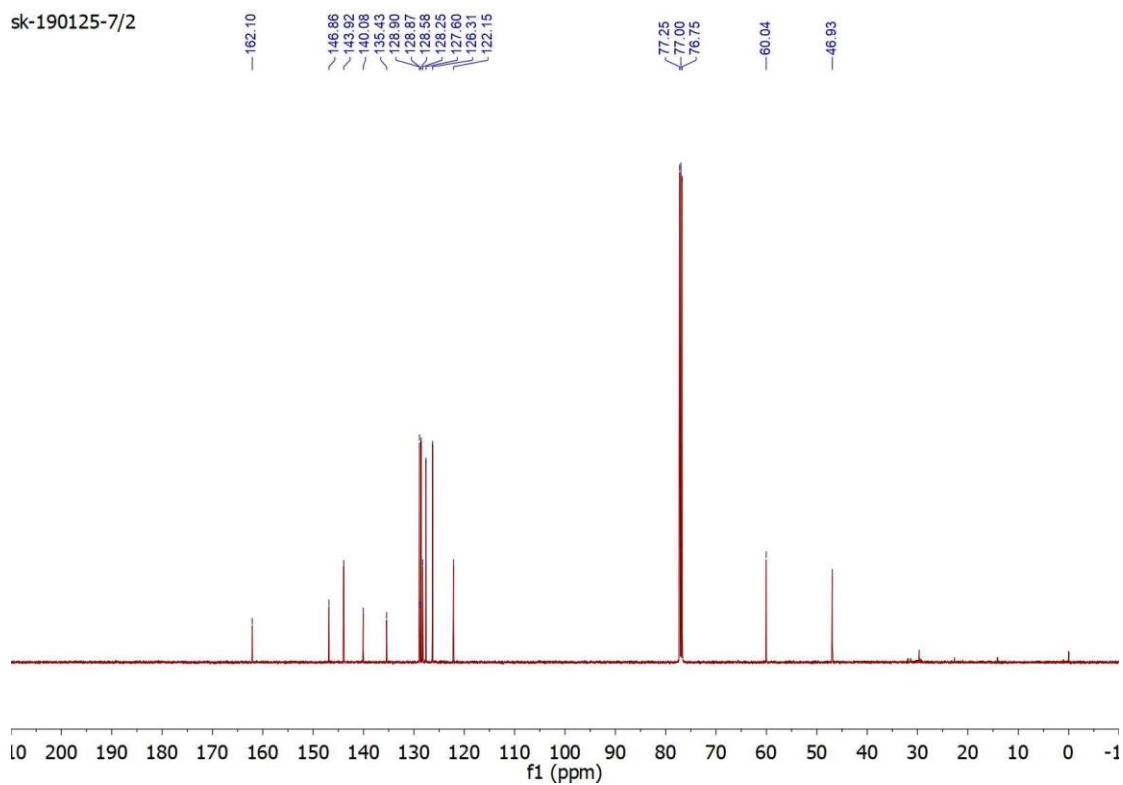

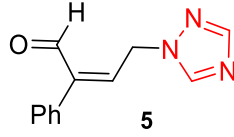

sk-191223-2/1

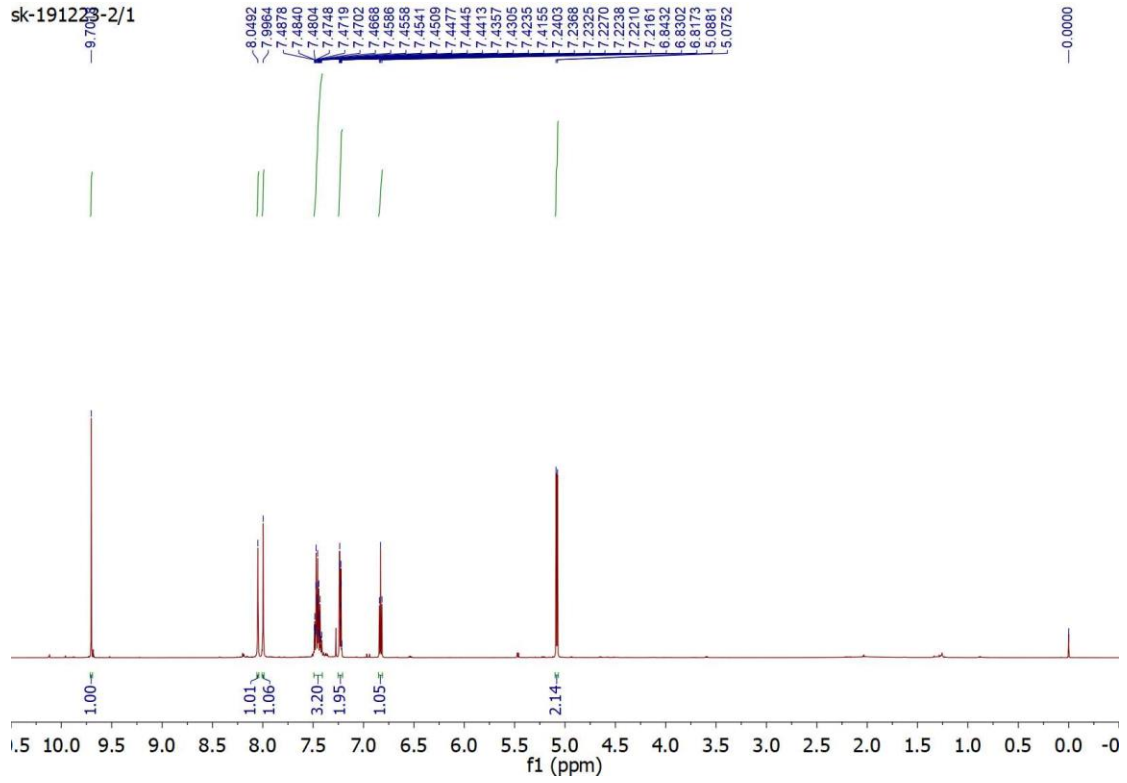

sk-191223-2/2

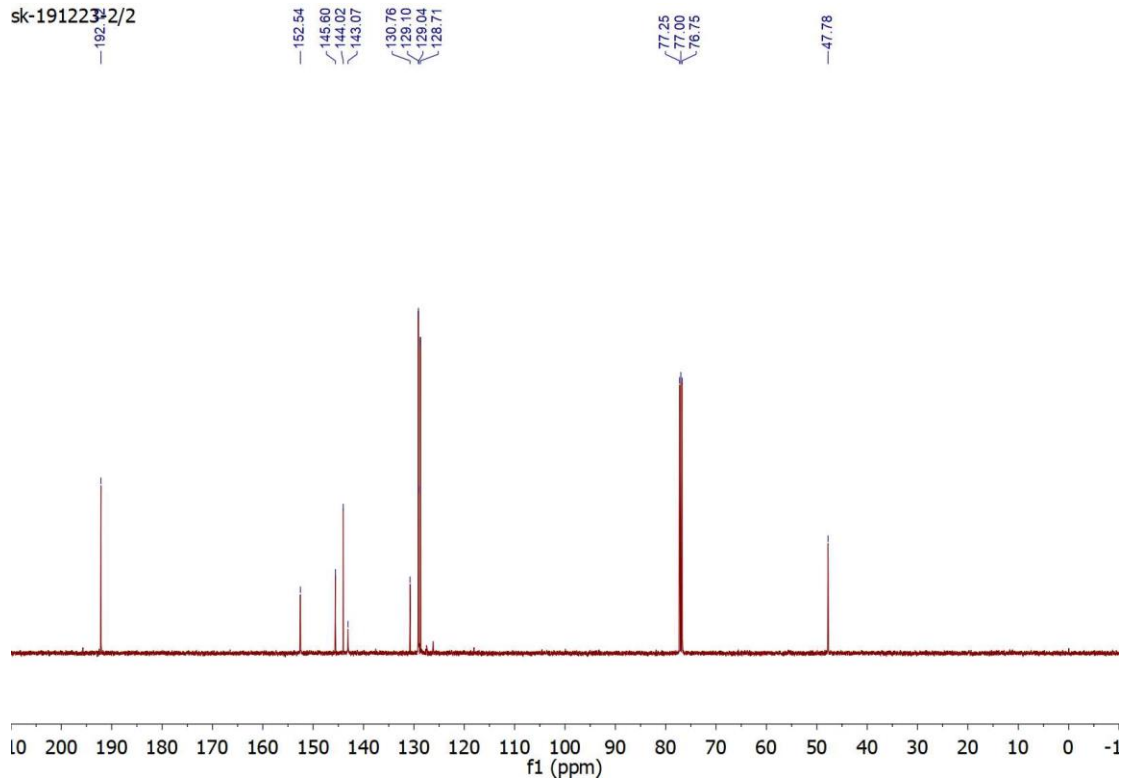

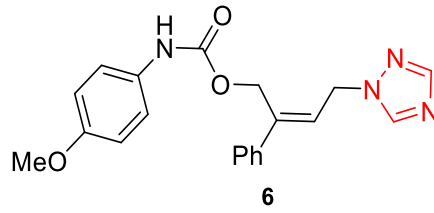

sk-191022-1/1

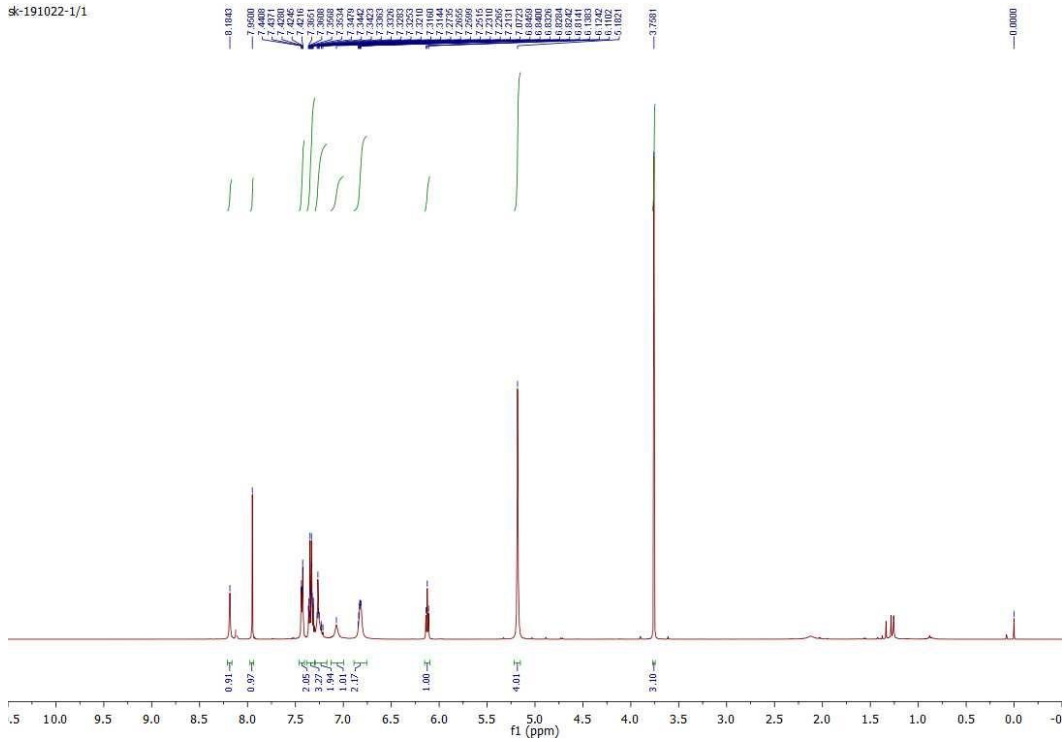

sk-191022-1/2

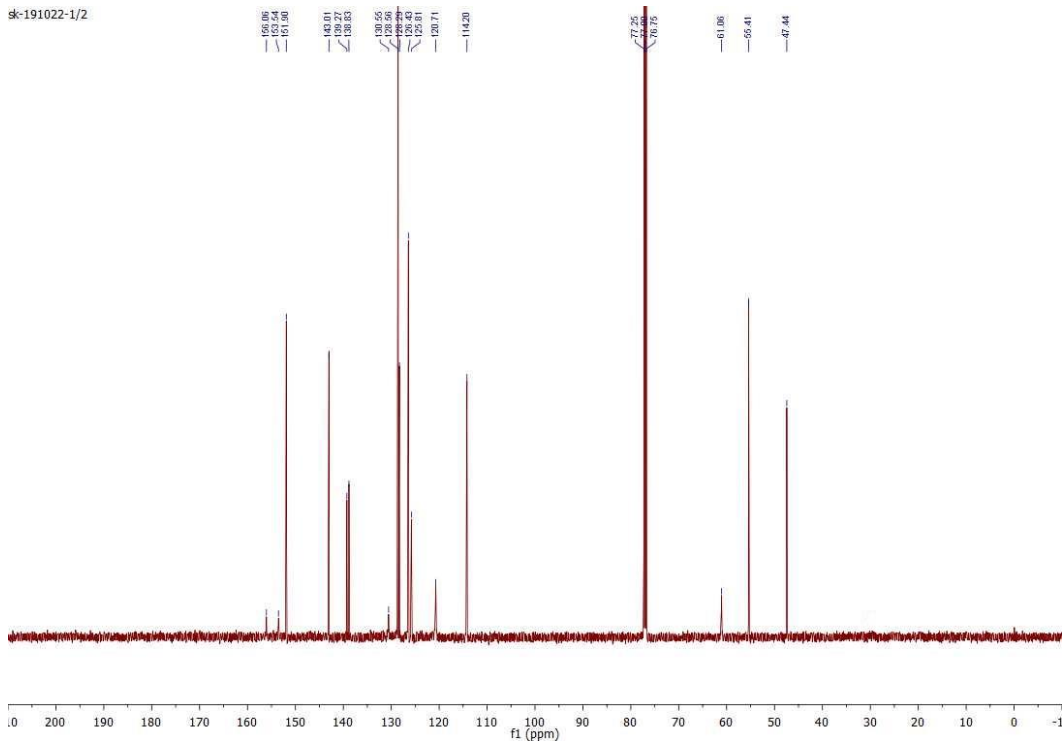

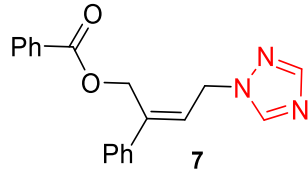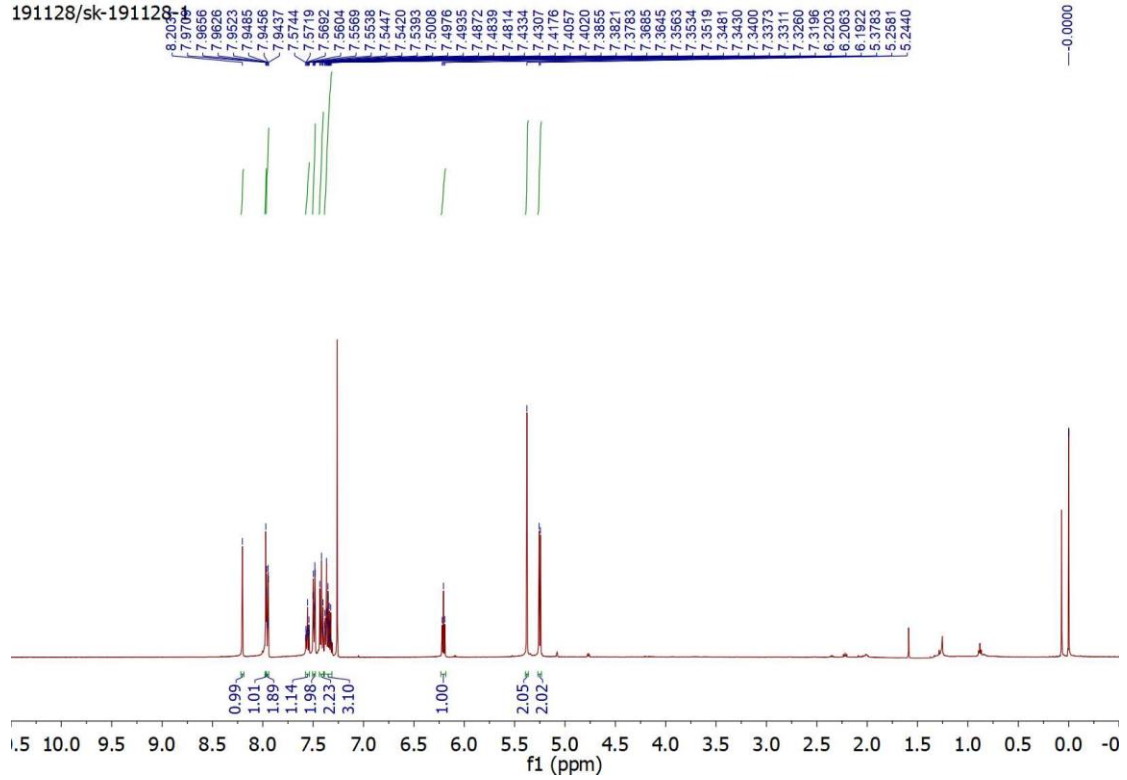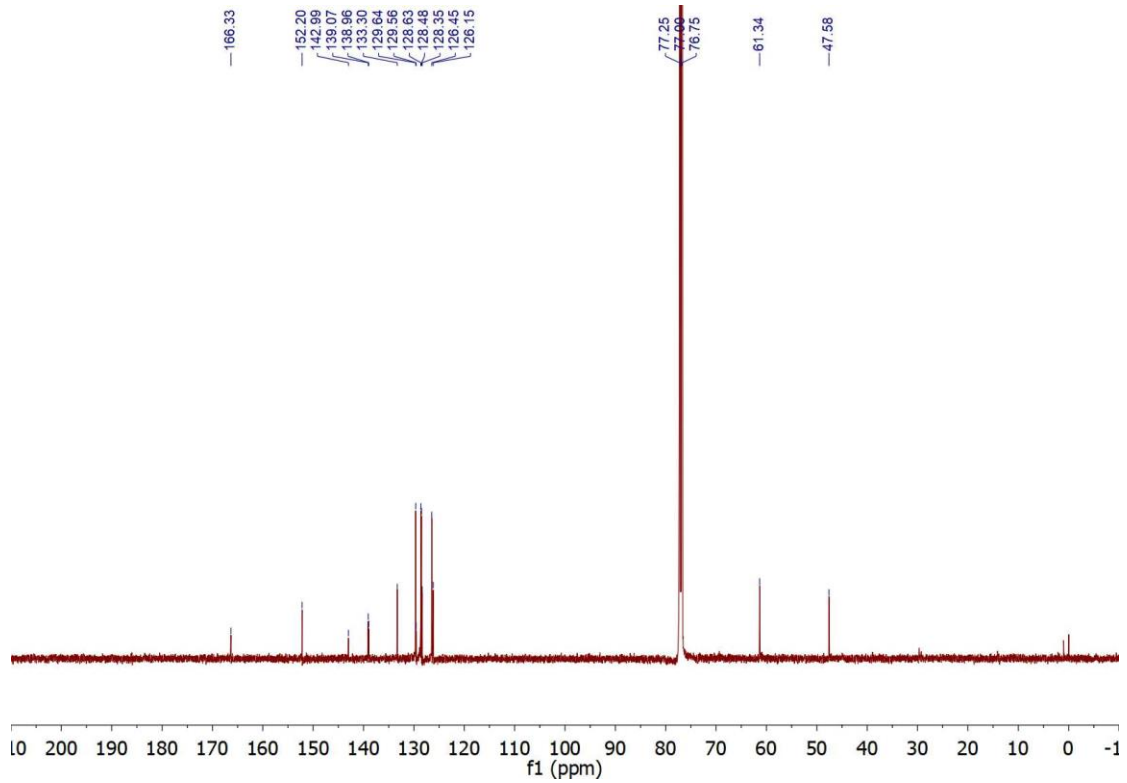

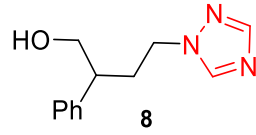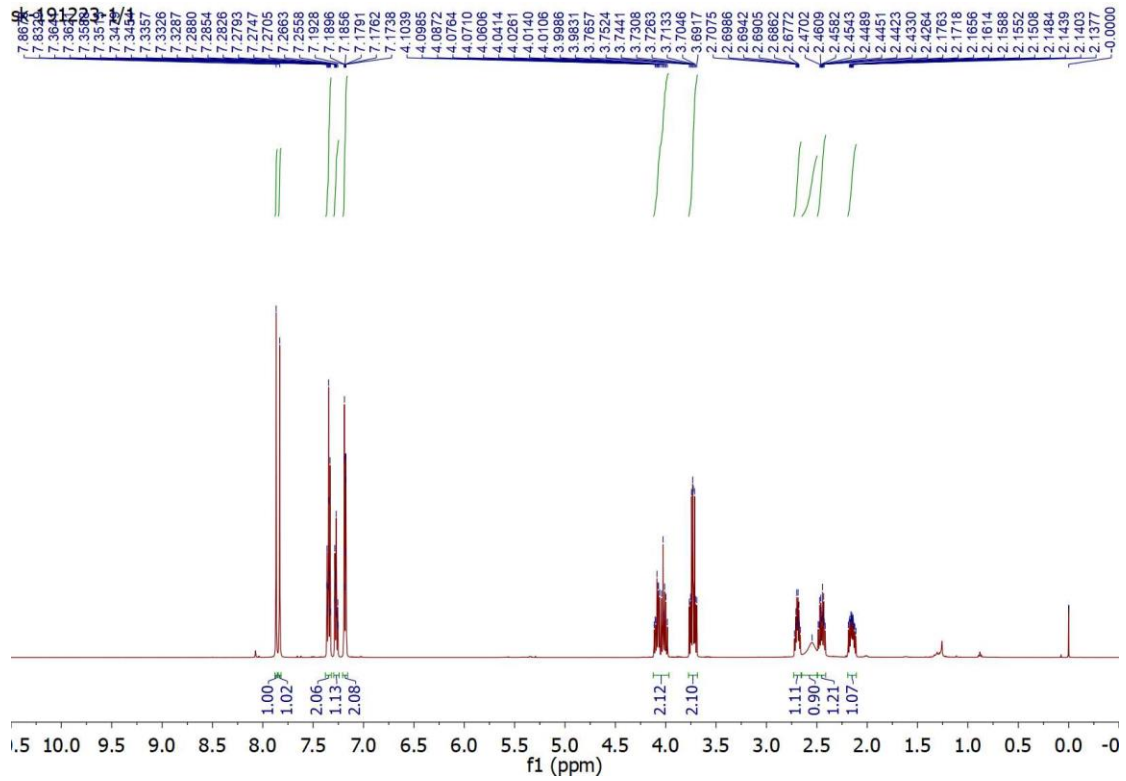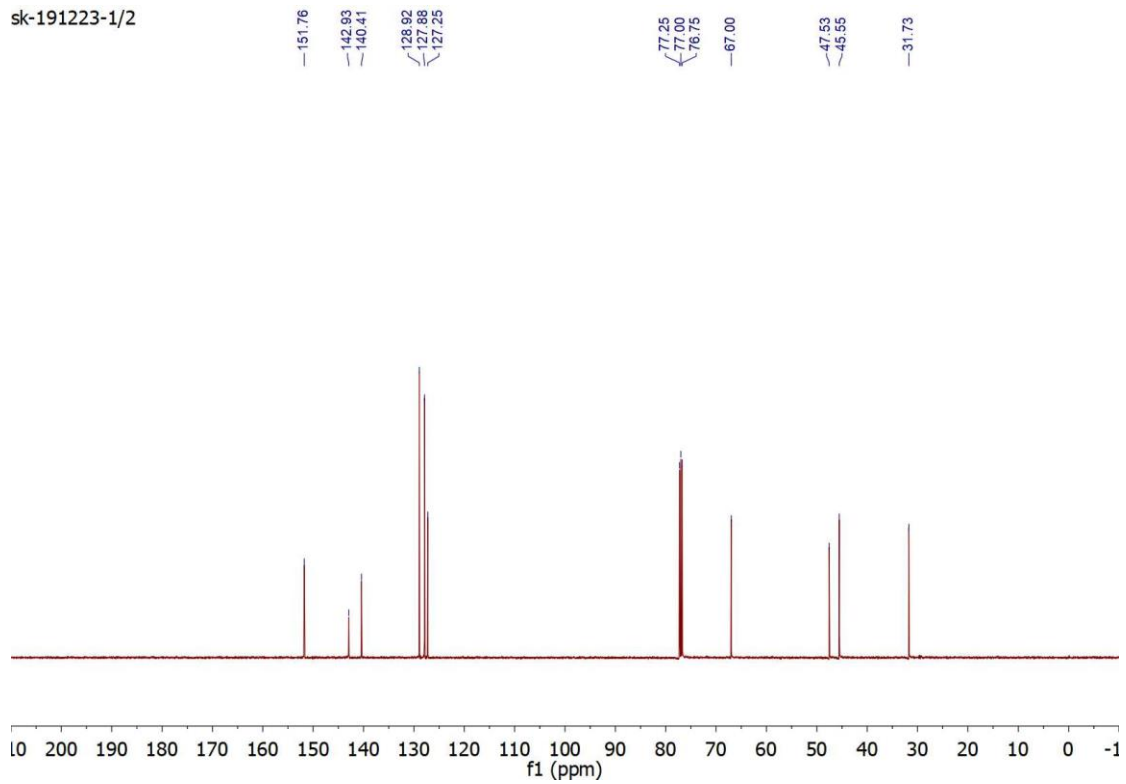

Supplement: d2ob01156e1.pdf [file d2ob01156e1.pdf]
